# Supplementary material
Source: publisher figshare collection journal article supplement (https://acs.figshare.com/ndownloader/files/4059988)
Supplement: Supplementary file 1 [file 4059988]

data_LiGa(SeO3)2
#----------------------------------------------------------------------------#
#                   CHEMICAL INFORMATION                                     #
#----------------------------------------------------------------------------#
 
_chemical_name_systematic
;
 ?
;
_chemical_formula_sum                   'Ga Li O6 Se2'
_chemical_formula_weight                330.58
_chemical_absolute_configuration        unk
 
#----------------------------------------------------------------------------#
#                   UNIT CELL INFORMATION                                    #
#----------------------------------------------------------------------------#
 
loop_
    _symmetry_equiv_pos_as_xyz
'x, y, z'
'-x, -y, z'
'y, -x, -z'
'-y, x, -z'
'-x+1/2, y, -z+3/4'
'x+1/2, -y, -z+3/4'
'-y+1/2, -x, z+3/4'
'y+1/2, x, z+3/4'
'x+1/2, y+1/2, z+1/2'
'-x+1/2, -y+1/2, z+1/2'
'y+1/2, -x+1/2, -z+1/2'
'-y+1/2, x+1/2, -z+1/2'
'-x+1, y+1/2, -z+5/4'
'x+1, -y+1/2, -z+5/4'
'-y+1, -x+1/2, z+5/4'
'y+1, x+1/2, z+5/4'

_symmetry_cell_setting                  Tetragonal 
_symmetry_space_group_name_H-M          'I-42d' 
_cell_length_a                          10.5402(15)
_cell_length_b                          10.5402(15)
_cell_length_c                          9.828(2)
_cell_angle_alpha                       90
_cell_angle_beta                        90
_cell_angle_gamma                       90
_cell_volume                            1091.8(3)
_cell_formula_units_Z                   8
_cell_measurement_temperature           173.0(2)
 
#----------------------------------------------------------------------------#
#                   CRYSTAL INFORMATION                                      #
#----------------------------------------------------------------------------#
 
_exptl_crystal_density_diffrn           4.022
_exptl_crystal_density_method           'not measured'
_exptl_crystal_F_000                    1200
_exptl_crystal_description              'Rod'
_exptl_crystal_colour                   'Colorless'
_exptl_crystal_size_max                 0.049
_exptl_crystal_size_mid                 0.025
_exptl_crystal_size_min                 0.013
_exptl_special_details
;
 ?
;
 
#----------------------------------------------------------------------------#
#                   ABSORPTION CORRECTION                                    #
#----------------------------------------------------------------------------#
 
_exptl_absorpt_coefficient_mu           18.33
_exptl_absorpt_correction_type          'EMPIRICAL'
_exptl_absorpt_process_details 
; 
 SADABS(Blessing, 1995) 
; 
_exptl_absorpt_correction_T_min		0.58
_exptl_absorpt_correction_T_max		0.79
 
#----------------------------------------------------------------------------#
#                   DATA COLLECTION                                          #
#----------------------------------------------------------------------------#
 
_diffrn_measurement_device_type         'Bruker SMART BREEZE'
_diffrn_measurement_method              CCD
_diffrn_ambient_temperature             173.0(2)
_diffrn_radiation_wavelength            0.71073
_diffrn_radiation_type                  MoK\a
_diffrn_radiation_monochromator         graphite
_diffrn_reflns_av_R_equivalents         0.1374
_diffrn_reflns_av_unetI/netI            0.0403
_diffrn_reflns_number                   8873
_diffrn_reflns_limit_h_min              -13
_diffrn_reflns_limit_h_max              13
_diffrn_reflns_limit_k_min              -14
_diffrn_reflns_limit_k_max              14
_diffrn_reflns_limit_l_min              -13
_diffrn_reflns_limit_l_max              13
_diffrn_reflns_theta_min                2.83
_diffrn_reflns_theta_max                28.29
_diffrn_reflns_theta_full               28.29
_diffrn_measured_fraction_theta_full
                                        1
_diffrn_measured_fraction_theta_max
                                        1
_reflns_number_total                    674
_reflns_number_gt                       652
_reflns_threshold_expression            >2s\(I)
 
#----------------------------------------------------------------------------#
#                   COMPUTER PROGRAMS USED                                   #
#----------------------------------------------------------------------------#
 
_computing_structure_refinement         'SHELXL-97 (Sheldrick, 1997)'
 
#----------------------------------------------------------------------------#
#                   STRUCTURE SOLUTION
#----------------------------------------------------------------------------#
 
_atom_sites_solution_primary            direct
_atom_sites_solution_secondary          difmap
 
#----------------------------------------------------------------------------#
#                   REFINEMENT INFORMATION                                   #
#----------------------------------------------------------------------------#
 
_refine_special_details
;
 Refinement of F^2^ against ALL reflections.  The weighted R-factor wR and
 goodness of fit S are based on F^2^, conventional R-factors R are based
 on F, with F set to zero for negative F^2^. The threshold expression of
 F^2^ > 2sigma(F^2^) is used only for calculating R-factors(gt) etc. and is
 not relevant to the choice of reflections for refinement.  R-factors based
 on F^2^ are statistically about twice as large as those based on F, and R-
 factors based on ALL data will be even larger.
;
_refine_ls_structure_factor_coef        Fsqd
_refine_ls_matrix_type                  full
_refine_ls_weighting_scheme             calc
_refine_ls_weighting_details
         'calc w=1/[\s^2^(Fo^2^)+(0.0237P)^2^+0.0000P] where P=(Fo^2^+2Fc^2^)/3'
_refine_ls_extinction_method            SHELXL
_refine_ls_extinction_expression
                                    Fc^*^=kFc[1+0.001xFc^2^\l^3^/sin(2\q)]^-1/4^
_refine_ls_extinction_coef              0.0020(2)
_refine_ls_number_reflns                674
_refine_ls_number_parameters            48
_refine_ls_number_restraints            0
_refine_ls_R_factor_all                 0.0231
_refine_ls_R_factor_gt                  0.0223
_refine_ls_wR_factor_ref                0.0476
_refine_ls_wR_factor_gt                 0.0473
_refine_ls_goodness_of_fit_ref          1.03
_refine_ls_restrained_S_all             1.03
_refine_ls_shift/su_max                 0
_refine_ls_shift/su_mean                0
_refine_ls_abs_structure_details
                                    'Flack H D (1983), Acta Cryst. A39, 876-881'
_refine_ls_abs_structure_Flack          -0.02(3)
_refine_diff_density_max                0.514
_refine_diff_density_min                -0.682
_refine_diff_density_rms                0.168
 
#----------------------------------------------------------------------------#
#                   ATOMIC TYPES, COORDINATES AND THERMAL PARAMETERS         #
#----------------------------------------------------------------------------#
 
loop_
    _atom_type_symbol
    _atom_type_description
    _atom_type_scat_dispersion_real
    _atom_type_scat_dispersion_imag
    _atom_type_scat_source
Li Li -0.0003 0.0001 'International Tables Vol C Tables 4.2.6.8 and 6.1.1.4'
O O 0.0106 0.006 'International Tables Vol C Tables 4.2.6.8 and 6.1.1.4'
Ga Ga 0.2307 1.6083 'International Tables Vol C Tables 4.2.6.8 and 6.1.1.4'
Se Se -0.0929 2.2259 'International Tables Vol C Tables 4.2.6.8 and 6.1.1.4'
 
loop_
    _atom_site_label
    _atom_site_type_symbol
    _atom_site_fract_x
    _atom_site_fract_y
    _atom_site_fract_z
    _atom_site_U_iso_or_equiv
    _atom_site_adp_type
    _atom_site_occupancy
    _atom_site_symmetry_multiplicity
    _atom_site_calc_flag
    _atom_site_refinement_flags
    _atom_site_disorder_assembly
    _atom_site_disorder_group
Se1 Se 0.44653(4) 0.22561(4) -0.15954(4) 0.00737(14) Uani 1 1 d . . .
Ga1 Ga 0.28795(6) 0.25 0.125 0.00634(17) Uani 1 2 d S . .
O1 O 0.4266(3) 0.2941(3) -0.0041(3) 0.0109(6) Uani 1 1 d . . .
O2 O 0.3417(3) 0.3165(3) -0.2489(3) 0.0102(6) Uani 1 1 d . . .
O3 O 0.5824(3) 0.2949(3) -0.2099(3) 0.0120(6) Uani 1 1 d . . .
Li1 Li 0.5640(13) 0.25 0.125 0.026(3) Uani 1 2 d S . .
 
loop_
    _atom_site_aniso_label
    _atom_site_aniso_U_11
    _atom_site_aniso_U_22
    _atom_site_aniso_U_33
    _atom_site_aniso_U_23
    _atom_site_aniso_U_13
    _atom_site_aniso_U_12
Se1 0.0069(2) 0.0087(2) 0.00654(19) -0.00026(14) 0.00014(16) 0.00017(16)
Ga1 0.0069(3) 0.0067(3) 0.0054(3) 0.0005(2) 0 0
O1 0.0102(15) 0.0133(16) 0.0090(13) -0.0012(11) 0.0033(11) -0.0022(13)
O2 0.0096(15) 0.0107(16) 0.0104(14) -0.0016(12) -0.0034(11) 0.0007(12)
O3 0.0063(14) 0.0201(17) 0.0096(13) 0.0029(12) -0.0013(11) -0.0025(14)
Li1 0.018(6) 0.043(8) 0.017(6) -0.011(5) 0 0
 
 
#----------------------------------------------------------------------------#
#                   MOLECULAR GEOMETRY                                       #
#----------------------------------------------------------------------------#
 
_geom_special_details
;
 All esds (except the esd in the dihedral angle between two l.s. planes)
 are estimated using the full covariance matrix.  The cell esds are taken
 into account individually in the estimation of esds in distances, angles
 and torsion angles; correlations between esds in cell parameters are only
 used when they are defined by crystal symmetry.  An approximate (isotropic)
 treatment of cell esds is used for estimating esds involving l.s. planes.
;
loop_
    _geom_bond_atom_site_label_1
    _geom_bond_atom_site_label_2
    _geom_bond_distance
    _geom_bond_site_symmetry_2
    _geom_bond_publ_flag
Se1 O3 1.682(3) . ?
Se1 O1 1.702(3) . ?
Se1 O2 1.706(3) . ?
Se1 Li1 3.054(10) 3_565 ?
Se1 Li1 3.069(5) . ?
Ga1 O3 1.955(3) 16_444 ?
Ga1 O3 1.955(3) 3_565 ?
Ga1 O2 1.974(3) 5_554 ?
Ga1 O2 1.974(3) 10 ?
Ga1 O1 1.991(3) . ?
Ga1 O1 1.991(3) 14_454 ?
Ga1 Li1 2.909(13) . ?
Ga1 Li1 3.169(8) 3_565 ?
Ga1 Li1 3.169(8) 12_545 ?
O1 Li1 1.980(10) . ?
O1 Li1 2.668(8) 3_565 ?
O2 Ga1 1.974(3) 10_554 ?
O2 Li1 2.001(9) 3_565 ?
O3 Ga1 1.955(3) 4_655 ?
Li1 O1 1.980(10) 14_454 ?
Li1 O2 2.001(9) 4_655 ?
Li1 O2 2.001(9) 15_554 ?
Li1 O1 2.668(8) 4_655 ?
Li1 O1 2.668(8) 15_554 ?
Li1 Se1 3.054(10) 4_655 ?
Li1 Se1 3.054(10) 15_554 ?
Li1 Se1 3.069(5) 14_454 ?
Li1 Ga1 3.169(8) 11 ?
 
loop_
    _geom_angle_atom_site_label_1
    _geom_angle_atom_site_label_2
    _geom_angle_atom_site_label_3
    _geom_angle
    _geom_angle_site_symmetry_1
    _geom_angle_site_symmetry_3
    _geom_angle_publ_flag
O3 Se1 O1 100.67(15) . . ?
O3 Se1 O2 98.99(16) . . ?
O1 Se1 O2 98.28(15) . . ?
O3 Se1 Li1 107.2(2) . 3_565 ?
O1 Se1 Li1 60.58(11) . 3_565 ?
O2 Se1 Li1 37.81(10) . 3_565 ?
O3 Se1 Li1 83.6(2) . . ?
O1 Se1 Li1 36.5(2) . . ?
O2 Se1 Li1 133.10(16) . . ?
Li1 Se1 Li1 96.4(2) 3_565 . ?
O3 Ga1 O3 175.7(2) 16_444 3_565 ?
O3 Ga1 O2 94.50(14) 16_444 5_554 ?
O3 Ga1 O2 88.46(12) 3_565 5_554 ?
O3 Ga1 O2 88.46(12) 16_444 10 ?
O3 Ga1 O2 94.50(14) 3_565 10 ?
O2 Ga1 O2 92.35(17) 5_554 10 ?
O3 Ga1 O1 84.92(13) 16_444 . ?
O3 Ga1 O1 91.94(13) 3_565 . ?
O2 Ga1 O1 91.45(12) 5_554 . ?
O2 Ga1 O1 172.61(13) 10 . ?
O3 Ga1 O1 91.94(13) 16_444 14_454 ?
O3 Ga1 O1 84.92(13) 3_565 14_454 ?
O2 Ga1 O1 172.61(13) 5_554 14_454 ?
O2 Ga1 O1 91.45(12) 10 14_454 ?
O1 Ga1 O1 85.51(17) . 14_454 ?
O3 Ga1 Li1 87.87(10) 16_444 . ?
O3 Ga1 Li1 87.87(10) 3_565 . ?
O2 Ga1 Li1 133.83(8) 5_554 . ?
O2 Ga1 Li1 133.83(8) 10 . ?
O1 Ga1 Li1 42.75(9) . . ?
O1 Ga1 Li1 42.75(9) 14_454 . ?
O3 Ga1 Li1 103.5(2) 16_444 3_565 ?
O3 Ga1 Li1 77.1(2) 3_565 3_565 ?
O2 Ga1 Li1 37.43(10) 5_554 3_565 ?
O2 Ga1 Li1 128.26(9) 10 3_565 ?
O1 Ga1 Li1 56.91(10) . 3_565 ?
O1 Ga1 Li1 137.00(12) 14_454 3_565 ?
Li1 Ga1 Li1 97.25(2) . 3_565 ?
O3 Ga1 Li1 77.1(2) 16_444 12_545 ?
O3 Ga1 Li1 103.5(2) 3_565 12_545 ?
O2 Ga1 Li1 128.26(9) 5_554 12_545 ?
O2 Ga1 Li1 37.43(10) 10 12_545 ?
O1 Ga1 Li1 137.00(12) . 12_545 ?
O1 Ga1 Li1 56.91(10) 14_454 12_545 ?
Li1 Ga1 Li1 97.25(2) . 12_545 ?
Li1 Ga1 Li1 165.50(5) 3_565 12_545 ?
Se1 O1 Li1 112.7(2) . . ?
Se1 O1 Ga1 124.30(16) . . ?
Li1 O1 Ga1 94.2(3) . . ?
Se1 O1 Li1 85.65(17) . 3_565 ?
Li1 O1 Li1 158.0(3) . 3_565 ?
Ga1 O1 Li1 84.40(14) . 3_565 ?
Se1 O2 Ga1 124.93(19) . 10_554 ?
Se1 O2 Li1 110.7(2) . 3_565 ?
Ga1 O2 Li1 105.73(16) 10_554 3_565 ?
Se1 O3 Ga1 128.87(18) . 4_655 ?
O1 Li1 O1 86.1(6) . 14_454 ?
O1 Li1 O2 137.46(17) . 4_655 ?
O1 Li1 O2 100.59(13) 14_454 4_655 ?
O1 Li1 O2 100.59(13) . 15_554 ?
O1 Li1 O2 137.46(17) 14_454 15_554 ?
O2 Li1 O2 101.9(6) 4_655 15_554 ?
O1 Li1 O1 87.76(13) . 4_655 ?
O1 Li1 O1 149.2(2) 14_454 4_655 ?
O2 Li1 O1 65.2(3) 4_655 4_655 ?
O2 Li1 O1 73.3(3) 15_554 4_655 ?
O1 Li1 O1 149.2(2) . 15_554 ?
O1 Li1 O1 87.76(13) 14_454 15_554 ?
O2 Li1 O1 73.3(3) 4_655 15_554 ?
O2 Li1 O1 65.2(3) 15_554 15_554 ?
O1 Li1 O1 111.8(5) 4_655 15_554 ?
O1 Li1 Ga1 43.0(3) . . ?
O1 Li1 Ga1 43.0(3) 14_454 . ?
O2 Li1 Ga1 129.0(3) 4_655 . ?
O2 Li1 Ga1 129.0(3) 15_554 . ?
O1 Li1 Ga1 124.1(2) 4_655 . ?
O1 Li1 Ga1 124.1(2) 15_554 . ?
O1 Li1 Se1 116.29(11) . 4_655 ?
O1 Li1 Se1 128.23(10) 14_454 4_655 ?
O2 Li1 Se1 31.50(16) 4_655 4_655 ?
O2 Li1 Se1 86.4(4) 15_554 4_655 ?
O1 Li1 Se1 33.77(13) 4_655 4_655 ?
O1 Li1 Se1 90.9(4) 15_554 4_655 ?
Ga1 Li1 Se1 136.58(17) . 4_655 ?
O1 Li1 Se1 128.23(10) . 15_554 ?
O1 Li1 Se1 116.29(11) 14_454 15_554 ?
O2 Li1 Se1 86.4(4) 4_655 15_554 ?
O2 Li1 Se1 31.50(16) 15_554 15_554 ?
O1 Li1 Se1 90.9(4) 4_655 15_554 ?
O1 Li1 Se1 33.77(13) 15_554 15_554 ?
Ga1 Li1 Se1 136.58(17) . 15_554 ?
Se1 Li1 Se1 86.8(3) 4_655 15_554 ?
O1 Li1 Se1 30.79(9) . . ?
O1 Li1 Se1 105.6(5) 14_454 . ?
O2 Li1 Se1 148.1(2) 4_655 . ?
O2 Li1 Se1 70.07(10) 15_554 . ?
O1 Li1 Se1 83.04(6) 4_655 . ?
O1 Li1 Se1 125.00(9) 15_554 . ?
Ga1 Li1 Se1 66.2(2) . . ?
Se1 Li1 Se1 116.81(13) 4_655 . ?
Se1 Li1 Se1 97.75(9) 15_554 . ?
O1 Li1 Se1 105.6(5) . 14_454 ?
O1 Li1 Se1 30.79(9) 14_454 14_454 ?
O2 Li1 Se1 70.07(10) 4_655 14_454 ?
O2 Li1 Se1 148.1(2) 15_554 14_454 ?
O1 Li1 Se1 125.00(9) 4_655 14_454 ?
O1 Li1 Se1 83.04(6) 15_554 14_454 ?
Ga1 Li1 Se1 66.2(2) . 14_454 ?
Se1 Li1 Se1 97.75(9) 4_655 14_454 ?
Se1 Li1 Se1 116.81(13) 15_554 14_454 ?
Se1 Li1 Se1 132.4(5) . 14_454 ?
O1 Li1 Ga1 168.2(3) . 11 ?
O1 Li1 Ga1 85.75(11) 14_454 11 ?
O2 Li1 Ga1 36.83(16) 4_655 11 ?
O2 Li1 Ga1 91.2(4) 15_554 11 ?
O1 Li1 Ga1 94.9(3) 4_655 11 ?
O1 Li1 Ga1 38.70(13) 15_554 11 ?
Ga1 Li1 Ga1 128.23(19) . 11 ?
Se1 Li1 Ga1 63.3(2) 4_655 11 ?
Se1 Li1 Ga1 63.3(2) 15_554 11 ?
Se1 Li1 Ga1 161.0(3) . 11 ?
Se1 Li1 Ga1 63.49(4) 14_454 11 ?

#===END


data_NaGa(SeO3)2
#----------------------------------------------------------------------------#
#                   CHEMICAL INFORMATION                                     #
#----------------------------------------------------------------------------#
 
_chemical_name_systematic
;
 ?
;
_chemical_formula_sum                   'Ga Na O6 Se2'
_chemical_formula_weight                346.63
 
#----------------------------------------------------------------------------#
#                   UNIT CELL INFORMATION                                    #
#----------------------------------------------------------------------------#
 
loop_
    _symmetry_equiv_pos_as_xyz
'x, y, z'
'-x+1/2, -y, z+1/2'
'-x, y+1/2, -z'
'x+1/2, -y+1/2, -z+1/2'
'-x, -y, -z'
'x-1/2, y, -z-1/2'
'x, -y-1/2, z'
'-x-1/2, y-1/2, z-1/2'
 
_symmetry_cell_setting                  Orthorhombic 
_symmetry_space_group_name_H-M          'Pnma' 
_cell_length_a                          12.4545(2)
_cell_length_b                          5.29670(10)
_cell_length_c                          7.80440(10)
_cell_angle_alpha                       90
_cell_angle_beta                        90
_cell_angle_gamma                       90
_cell_volume                            514.839(14)
_cell_formula_units_Z                   4
_cell_measurement_temperature           173.0(2)
 
#----------------------------------------------------------------------------#
#                   CRYSTAL INFORMATION                                      #
#----------------------------------------------------------------------------#
 
_exptl_crystal_density_diffrn           4.472
_exptl_crystal_density_method           'not measured'
_exptl_crystal_F_000                    632
_exptl_crystal_description              'Block'
_exptl_crystal_colour                   'Colorless'
_exptl_crystal_size_max                 0.050
_exptl_crystal_size_mid                 0.031
_exptl_crystal_size_min                 0.025
_exptl_special_details
;
 ?
;
 
#----------------------------------------------------------------------------#
#                   ABSORPTION CORRECTION                                    #
#----------------------------------------------------------------------------#
 
_exptl_absorpt_coefficient_mu           19.525
_exptl_absorpt_correction_type          'EMPIRICAL'
_exptl_absorpt_process_details 
; 
 SADABS(Blessing, 1995) 
; 
_exptl_absorpt_correction_T_min		0.49
_exptl_absorpt_correction_T_max		0.61
 
#----------------------------------------------------------------------------#
#                   DATA COLLECTION                                          #
#----------------------------------------------------------------------------#
 
_diffrn_measurement_device_type         'Bruker SMART BREEZE'
_diffrn_measurement_method              CCD
_diffrn_ambient_temperature             173.0(2)
_diffrn_radiation_wavelength            0.71073
_diffrn_radiation_type                  MoK\a
_diffrn_radiation_monochromator         graphite
_diffrn_reflns_av_R_equivalents         0.1031
_diffrn_reflns_av_unetI/netI            0.0425
_diffrn_reflns_number                   8211
_diffrn_reflns_limit_h_min              -13
_diffrn_reflns_limit_h_max              16
_diffrn_reflns_limit_k_min              -7
_diffrn_reflns_limit_k_max              7
_diffrn_reflns_limit_l_min              -10
_diffrn_reflns_limit_l_max              10
_diffrn_reflns_theta_min                3.08
_diffrn_reflns_theta_max                28.31
_diffrn_reflns_theta_full               28.31
_diffrn_measured_fraction_theta_full
                                        1
_diffrn_measured_fraction_theta_max
                                        1
_reflns_number_total                    706
_reflns_number_gt                       593
_reflns_threshold_expression            >2s\(I)
 
#----------------------------------------------------------------------------#
#                   COMPUTER PROGRAMS USED                                   #
#----------------------------------------------------------------------------#
 
_computing_structure_refinement         'SHELXL-97 (Sheldrick, 1997)'
 
#----------------------------------------------------------------------------#
#                   STRUCTURE SOLUTION
#----------------------------------------------------------------------------#
 
_atom_sites_solution_primary            direct
_atom_sites_solution_secondary          difmap
 
#----------------------------------------------------------------------------#
#                   REFINEMENT INFORMATION                                   #
#----------------------------------------------------------------------------#
 
_refine_special_details
;
 Refinement of F^2^ against ALL reflections.  The weighted R-factor wR and
 goodness of fit S are based on F^2^, conventional R-factors R are based
 on F, with F set to zero for negative F^2^. The threshold expression of
 F^2^ > 2sigma(F^2^) is used only for calculating R-factors(gt) etc. and is
 not relevant to the choice of reflections for refinement.  R-factors based
 on F^2^ are statistically about twice as large as those based on F, and R-
 factors based on ALL data will be even larger.
;
_refine_ls_structure_factor_coef        Fsqd
_refine_ls_matrix_type                  full
_refine_ls_weighting_scheme             calc
_refine_ls_weighting_details
         'calc w=1/[\s^2^(Fo^2^)+(0.0353P)^2^+0.0000P] where P=(Fo^2^+2Fc^2^)/3'
_refine_ls_extinction_method            SHELXL
_refine_ls_extinction_expression
                                    Fc^*^=kFc[1+0.001xFc^2^\l^3^/sin(2\q)]^-1/4^
_refine_ls_extinction_coef              0.0055(7)
_refine_ls_number_reflns                706
_refine_ls_number_parameters            56
_refine_ls_number_restraints            0
_refine_ls_R_factor_all                 0.0372
_refine_ls_R_factor_gt                  0.0292
_refine_ls_wR_factor_ref                0.0675
_refine_ls_wR_factor_gt                 0.0636
_refine_ls_goodness_of_fit_ref          1.01
_refine_ls_restrained_S_all             1.01
_refine_ls_shift/su_max                 0
_refine_ls_shift/su_mean                0
_refine_diff_density_max                0.826
_refine_diff_density_min                -1.273
_refine_diff_density_rms                0.307
 
#----------------------------------------------------------------------------#
#                   ATOMIC TYPES, COORDINATES AND THERMAL PARAMETERS         #
#----------------------------------------------------------------------------#
 
loop_
    _atom_type_symbol
    _atom_type_description
    _atom_type_scat_dispersion_real
    _atom_type_scat_dispersion_imag
    _atom_type_scat_source
O O 0.0106 0.006 'International Tables Vol C Tables 4.2.6.8 and 6.1.1.4'
Na Na 0.0362 0.0249 'International Tables Vol C Tables 4.2.6.8 and 6.1.1.4'
Ga Ga 0.2307 1.6083 'International Tables Vol C Tables 4.2.6.8 and 6.1.1.4'
Se Se -0.0929 2.2259 'International Tables Vol C Tables 4.2.6.8 and 6.1.1.4'
 
loop_
    _atom_site_label
    _atom_site_type_symbol
    _atom_site_fract_x
    _atom_site_fract_y
    _atom_site_fract_z
    _atom_site_U_iso_or_equiv
    _atom_site_adp_type
    _atom_site_occupancy
    _atom_site_symmetry_multiplicity
    _atom_site_calc_flag
    _atom_site_refinement_flags
    _atom_site_disorder_assembly
    _atom_site_disorder_group
Se1 Se 0.06633(5) 0.25 0.71063(7) 0.01025(19) Uani 1 2 d S . .
Se2 Se -0.29355(5) -0.25 0.99076(7) 0.01134(19) Uani 1 2 d S . .
Ga1 Ga -0.10154(5) -0.25 0.70091(8) 0.0099(2) Uani 1 2 d S . .
Na1 Na -0.1149(2) 0.25 1.0104(3) 0.0220(6) Uani 1 2 d S . .
O1 O 0.0201(4) 0.25 0.5086(4) 0.0135(9) Uani 1 2 d S . .
O2 O -0.0018(3) 0.0057(5) 0.7987(4) 0.0165(7) Uani 1 1 d . . .
O3 O -0.1622(4) -0.25 0.9338(5) 0.0175(9) Uani 1 2 d S . .
O4 O -0.2888(3) -0.0014(6) 1.1269(4) 0.0233(8) Uani 1 1 d . . .
 
loop_
    _atom_site_aniso_label
    _atom_site_aniso_U_11
    _atom_site_aniso_U_22
    _atom_site_aniso_U_33
    _atom_site_aniso_U_23
    _atom_site_aniso_U_13
    _atom_site_aniso_U_12
Se1 0.0100(3) 0.0105(3) 0.0102(3) 0 0.0000(2) 0
Se2 0.0099(3) 0.0133(3) 0.0108(3) 0 0.0001(2) 0
Ga1 0.0109(4) 0.0106(3) 0.0081(3) 0 0.0007(2) 0
Na1 0.0249(15) 0.0226(15) 0.0185(14) 0 0.0008(11) 0
O1 0.017(2) 0.016(2) 0.0077(19) 0 -0.0011(16) 0
O2 0.0244(18) 0.0133(15) 0.0119(15) 0.0039(11) 0.0004(12) -0.0083(14)
O3 0.008(2) 0.031(3) 0.013(2) 0 -0.0015(18) 0
O4 0.0178(17) 0.0253(18) 0.0267(18) -0.0142(14) -0.0033(15) 0.0090(14)
 
 
#----------------------------------------------------------------------------#
#                   MOLECULAR GEOMETRY                                       #
#----------------------------------------------------------------------------#
 
_geom_special_details
;
 All esds (except the esd in the dihedral angle between two l.s. planes)
 are estimated using the full covariance matrix.  The cell esds are taken
 into account individually in the estimation of esds in distances, angles
 and torsion angles; correlations between esds in cell parameters are only
 used when they are defined by crystal symmetry.  An approximate (isotropic)
 treatment of cell esds is used for estimating esds involving l.s. planes.
;
loop_
    _geom_bond_atom_site_label_1
    _geom_bond_atom_site_label_2
    _geom_bond_distance
    _geom_bond_site_symmetry_2
    _geom_bond_publ_flag
Se1 O1 1.678(4) . ?
Se1 O2 1.694(3) . ?
Se1 O2 1.694(3) 7_565 ?
Se1 Na1 3.251(3) . ?
Se1 Na1 3.4812(16) 5_567 ?
Se1 Na1 3.4812(16) 5_557 ?
Se2 O4 1.693(3) . ?
Se2 O4 1.693(3) 7 ?
Se2 O3 1.695(4) . ?
Se2 Na1 3.462(2) . ?
Se2 Na1 3.462(2) 1_545 ?
Ga1 O1 1.925(4) 5_556 ?
Ga1 O3 1.968(4) . ?
Ga1 O2 1.990(3) . ?
Ga1 O2 1.990(3) 7 ?
Ga1 O4 1.993(3) 8 ?
Ga1 O4 1.993(3) 2_454 ?
Ga1 Na1 3.513(3) 5_557 ?
Ga1 Na1 3.5884(16) . ?
Ga1 Na1 3.5884(16) 1_545 ?
Na1 O2 2.483(4) 3_557 ?
Na1 O2 2.483(4) 5_557 ?
Na1 O2 2.528(4) 7_565 ?
Na1 O2 2.528(4) . ?
Na1 O4 2.700(4) 7_565 ?
Na1 O4 2.700(4) . ?
Na1 O3 2.7782(15) . ?
Na1 O3 2.7782(15) 1_565 ?
Na1 Se2 3.462(2) 1_565 ?
Na1 Se1 3.4812(16) 5_567 ?
O1 Ga1 1.925(4) 5_556 ?
O2 Na1 2.483(4) 5_557 ?
O3 Na1 2.7782(15) 1_545 ?
O4 Ga1 1.993(3) 2_455 ?
 
loop_
    _geom_angle_atom_site_label_1
    _geom_angle_atom_site_label_2
    _geom_angle_atom_site_label_3
    _geom_angle
    _geom_angle_site_symmetry_1
    _geom_angle_site_symmetry_3
    _geom_angle_publ_flag
O1 Se1 O2 102.08(14) . . ?
O1 Se1 O2 102.08(14) . 7_565 ?
O2 Se1 O2 99.7(2) . 7_565 ?
O1 Se1 Na1 115.94(16) . . ?
O2 Se1 Na1 50.20(10) . . ?
O2 Se1 Na1 50.20(10) 7_565 . ?
O1 Se1 Na1 130.32(3) . 5_567 ?
O2 Se1 Na1 114.49(11) . 5_567 ?
O2 Se1 Na1 41.57(12) 7_565 5_567 ?
Na1 Se1 Na1 70.77(6) . 5_567 ?
O1 Se1 Na1 130.32(3) . 5_557 ?
O2 Se1 Na1 41.57(12) . 5_557 ?
O2 Se1 Na1 114.49(11) 7_565 5_557 ?
Na1 Se1 Na1 70.77(6) . 5_557 ?
Na1 Se1 Na1 99.06(6) 5_567 5_557 ?
O4 Se2 O4 102.1(2) . 7 ?
O4 Se2 O3 97.50(15) . . ?
O4 Se2 O3 97.50(14) 7 . ?
O4 Se2 Na1 49.81(12) . . ?
O4 Se2 Na1 122.99(11) 7 . ?
O3 Se2 Na1 52.52(6) . . ?
O4 Se2 Na1 122.99(11) . 1_545 ?
O4 Se2 Na1 49.81(12) 7 1_545 ?
O3 Se2 Na1 52.52(6) . 1_545 ?
Na1 Se2 Na1 99.80(8) . 1_545 ?
O1 Ga1 O3 170.75(19) 5_556 . ?
O1 Ga1 O2 89.82(13) 5_556 . ?
O3 Ga1 O2 83.41(13) . . ?
O1 Ga1 O2 89.82(13) 5_556 7 ?
O3 Ga1 O2 83.41(13) . 7 ?
O2 Ga1 O2 85.77(17) . 7 ?
O1 Ga1 O4 96.61(13) 5_556 8 ?
O3 Ga1 O4 90.26(13) . 8 ?
O2 Ga1 O4 173.54(13) . 8 ?
O2 Ga1 O4 94.84(13) 7 8 ?
O1 Ga1 O4 96.61(13) 5_556 2_454 ?
O3 Ga1 O4 90.26(13) . 2_454 ?
O2 Ga1 O4 94.84(13) . 2_454 ?
O2 Ga1 O4 173.54(13) 7 2_454 ?
O4 Ga1 O4 83.8(2) 8 2_454 ?
O1 Ga1 Na1 98.06(14) 5_556 5_557 ?
O3 Ga1 Na1 72.69(13) . 5_557 ?
O2 Ga1 Na1 43.53(8) . 5_557 ?
O2 Ga1 Na1 43.53(8) 7 5_557 ?
O4 Ga1 Na1 135.37(10) 8 5_557 ?
O4 Ga1 Na1 135.37(10) 2_454 5_557 ?
O1 Ga1 Na1 126.62(7) 5_556 . ?
O3 Ga1 Na1 50.25(5) . . ?
O2 Ga1 Na1 42.98(10) . . ?
O2 Ga1 Na1 105.84(9) 7 . ?
O4 Ga1 Na1 131.02(10) 8 . ?
O4 Ga1 Na1 70.74(11) 2_454 . ?
Na1 Ga1 Na1 66.67(6) 5_557 . ?
O1 Ga1 Na1 126.62(7) 5_556 1_545 ?
O3 Ga1 Na1 50.25(5) . 1_545 ?
O2 Ga1 Na1 105.84(9) . 1_545 ?
O2 Ga1 Na1 42.98(10) 7 1_545 ?
O4 Ga1 Na1 70.74(11) 8 1_545 ?
O4 Ga1 Na1 131.02(10) 2_454 1_545 ?
Na1 Ga1 Na1 66.67(6) 5_557 1_545 ?
Na1 Ga1 Na1 95.13(6) . 1_545 ?
O2 Na1 O2 66.10(14) 3_557 5_557 ?
O2 Na1 O2 77.67(12) 3_557 7_565 ?
O2 Na1 O2 110.18(13) 5_557 7_565 ?
O2 Na1 O2 110.18(13) 3_557 . ?
O2 Na1 O2 77.67(12) 5_557 . ?
O2 Na1 O2 61.60(13) 7_565 . ?
O2 Na1 O4 89.92(11) 3_557 7_565 ?
O2 Na1 O4 122.46(13) 5_557 7_565 ?
O2 Na1 O4 114.49(9) 7_565 7_565 ?
O2 Na1 O4 156.88(15) . 7_565 ?
O2 Na1 O4 122.46(13) 3_557 . ?
O2 Na1 O4 89.92(11) 5_557 . ?
O2 Na1 O4 156.88(15) 7_565 . ?
O2 Na1 O4 114.49(9) . . ?
O4 Na1 O4 59.12(14) 7_565 . ?
O2 Na1 O3 140.63(13) 3_557 . ?
O2 Na1 O3 74.53(10) 5_557 . ?
O2 Na1 O3 117.74(13) 7_565 . ?
O2 Na1 O3 59.29(11) . . ?
O4 Na1 O3 111.89(15) 7_565 . ?
O4 Na1 O3 55.40(12) . . ?
O2 Na1 O3 74.53(10) 3_557 1_565 ?
O2 Na1 O3 140.63(13) 5_557 1_565 ?
O2 Na1 O3 59.29(11) 7_565 1_565 ?
O2 Na1 O3 117.74(13) . 1_565 ?
O4 Na1 O3 55.40(12) 7_565 1_565 ?
O4 Na1 O3 111.89(15) . 1_565 ?
O3 Na1 O3 144.8(2) . 1_565 ?
O2 Na1 Se1 91.44(11) 3_557 . ?
O2 Na1 Se1 91.44(11) 5_557 . ?
O2 Na1 Se1 30.98(7) 7_565 . ?
O2 Na1 Se1 30.98(7) . . ?
O4 Na1 Se1 143.05(8) 7_565 . ?
O4 Na1 Se1 143.05(8) . . ?
O3 Na1 Se1 89.55(11) . . ?
O3 Na1 Se1 89.55(11) 1_565 . ?
O2 Na1 Se2 145.08(11) 3_557 . ?
O2 Na1 Se2 89.18(7) 5_557 . ?
O2 Na1 Se2 136.12(10) 7_565 . ?
O2 Na1 Se2 86.42(7) . . ?
O4 Na1 Se2 82.93(10) 7_565 . ?
O4 Na1 Se2 28.62(6) . . ?
O3 Na1 Se2 28.96(9) . . ?
O3 Na1 Se2 125.69(13) 1_565 . ?
Se1 Na1 Se2 114.47(5) . . ?
O2 Na1 Se2 89.18(7) 3_557 1_565 ?
O2 Na1 Se2 145.08(10) 5_557 1_565 ?
O2 Na1 Se2 86.42(7) 7_565 1_565 ?
O2 Na1 Se2 136.12(10) . 1_565 ?
O4 Na1 Se2 28.62(6) 7_565 1_565 ?
O4 Na1 Se2 82.93(10) . 1_565 ?
O3 Na1 Se2 125.69(13) . 1_565 ?
O3 Na1 Se2 28.96(9) 1_565 1_565 ?
Se1 Na1 Se2 114.47(5) . 1_565 ?
Se2 Na1 Se2 99.80(8) . 1_565 ?
O2 Na1 Se1 26.91(7) 3_557 5_567 ?
O2 Na1 Se1 86.45(9) 5_557 5_567 ?
O2 Na1 Se1 85.54(7) 7_565 5_567 ?
O2 Na1 Se1 134.54(12) . 5_567 ?
O4 Na1 Se1 63.48(8) 7_565 5_567 ?
O4 Na1 Se1 107.71(10) . 5_567 ?
O3 Na1 Se1 153.72(11) . 5_567 ?
O3 Na1 Se1 56.38(8) 1_565 5_567 ?
Se1 Na1 Se1 109.23(6) . 5_567 ?
Se2 Na1 Se1 136.17(8) . 5_567 ?
Se2 Na1 Se1 63.74(2) 1_565 5_567 ?
Se1 O1 Ga1 128.1(3) . 5_556 ?
Se1 O2 Ga1 132.61(17) . . ?
Se1 O2 Na1 111.52(16) . 5_557 ?
Ga1 O2 Na1 102.97(11) . 5_557 ?
Se1 O2 Na1 98.82(12) . . ?
Ga1 O2 Na1 104.56(14) . . ?
Na1 O2 Na1 102.33(12) 5_557 . ?
Se2 O3 Ga1 127.8(2) . . ?
Se2 O3 Na1 98.51(12) . . ?
Ga1 O3 Na1 96.75(11) . . ?
Se2 O3 Na1 98.51(12) . 1_545 ?
Ga1 O3 Na1 96.75(11) . 1_545 ?
Na1 O3 Na1 144.8(2) . 1_545 ?
Se2 O4 Ga1 132.63(18) . 2_455 ?
Se2 O4 Na1 101.57(15) . . ?
Ga1 O4 Na1 108.52(13) 2_455 . ?
 
#===END


data_KGa(SeO3)2
#----------------------------------------------------------------------------#
#                   CHEMICAL INFORMATION                                     #
#----------------------------------------------------------------------------#
 
_chemical_name_systematic
;
 ?
;
_chemical_formula_sum                   'Ga K O6 Se2'
_chemical_formula_weight                362.74
 
#----------------------------------------------------------------------------#
#                   UNIT CELL INFORMATION                                    #
#----------------------------------------------------------------------------#
 
loop_
    _symmetry_equiv_pos_as_xyz
'x, y, z'
'-x+1/2, -y, z+1/2'
'-x, y+1/2, -z'
'x+1/2, -y+1/2, -z+1/2'
'-x, -y, -z'
'x-1/2, y, -z-1/2'
'x, -y-1/2, z'
'-x-1/2, y-1/2, z-1/2'
 
_symmetry_cell_setting                  Orthorhombic 
_symmetry_space_group_name_H-M          'Pnma'
_cell_length_a                          14.9753(3)
_cell_length_b                          5.32510(10)
_cell_length_c                          7.28750(10)
_cell_angle_alpha                       90
_cell_angle_beta                        90
_cell_angle_gamma                       90
_cell_volume                            581.141(18)
_cell_formula_units_Z                   4
_cell_measurement_temperature           173.0(2)
 
#----------------------------------------------------------------------------#
#                   CRYSTAL INFORMATION                                      #
#----------------------------------------------------------------------------#
 
_exptl_crystal_density_diffrn           4.146
_exptl_crystal_density_method           'not measured'
_exptl_crystal_F_000                    664
_exptl_crystal_description              'Block'
_exptl_crystal_colour                   'Colorless'
_exptl_crystal_size_max                 0.042
_exptl_crystal_size_mid                 0.037
_exptl_crystal_size_min                 0.015
_exptl_special_details
;
 ?
;
 
#----------------------------------------------------------------------------#
#                   ABSORPTION CORRECTION                                    #
#----------------------------------------------------------------------------#
 
_exptl_absorpt_coefficient_mu           17.941
_exptl_absorpt_correction_type          'EMPIRICAL'
_exptl_absorpt_process_details 
; 
 SADABS(Blessing, 1995) 
; 
_exptl_absorpt_correction_T_min		0.48
_exptl_absorpt_correction_T_max		0.76
 
#----------------------------------------------------------------------------#
#                   DATA COLLECTION                                          #
#----------------------------------------------------------------------------#
 
_diffrn_measurement_device_type         'Bruker SMART BREEZE'
_diffrn_measurement_method              CCD
_diffrn_ambient_temperature             173.0(2)
_diffrn_radiation_wavelength            0.71073
_diffrn_radiation_type                  MoK\a
_diffrn_radiation_monochromator         graphite
_diffrn_reflns_av_R_equivalents         0.0666
_diffrn_reflns_av_unetI/netI            0.0275
_diffrn_reflns_number                   7593
_diffrn_reflns_limit_h_min              -19
_diffrn_reflns_limit_h_max              17
_diffrn_reflns_limit_k_min              -7
_diffrn_reflns_limit_k_max              7
_diffrn_reflns_limit_l_min              -9
_diffrn_reflns_limit_l_max              9
_diffrn_reflns_theta_min                2.72
_diffrn_reflns_theta_max                28.25
_diffrn_reflns_theta_full               28.25
_diffrn_measured_fraction_theta_full
                                        1
_diffrn_measured_fraction_theta_max
                                        1
_reflns_number_total                    787
_reflns_number_gt                       728
_reflns_threshold_expression            >2s\(I)
 
#----------------------------------------------------------------------------#
#                   COMPUTER PROGRAMS USED                                   #
#----------------------------------------------------------------------------#
 
_computing_structure_refinement         'SHELXL-97 (Sheldrick, 1997)'
 
#----------------------------------------------------------------------------#
#                   STRUCTURE SOLUTION
#----------------------------------------------------------------------------#
 
_atom_sites_solution_primary            direct
_atom_sites_solution_secondary          difmap
 
#----------------------------------------------------------------------------#
#                   REFINEMENT INFORMATION                                   #
#----------------------------------------------------------------------------#
 
_refine_special_details
;
 Refinement of F^2^ against ALL reflections.  The weighted R-factor wR and
 goodness of fit S are based on F^2^, conventional R-factors R are based
 on F, with F set to zero for negative F^2^. The threshold expression of
 F^2^ > 2sigma(F^2^) is used only for calculating R-factors(gt) etc. and is
 not relevant to the choice of reflections for refinement.  R-factors based
 on F^2^ are statistically about twice as large as those based on F, and R-
 factors based on ALL data will be even larger.
;
_refine_ls_structure_factor_coef        Fsqd
_refine_ls_matrix_type                  full
_refine_ls_weighting_scheme             calc
_refine_ls_weighting_details
         'calc w=1/[\s^2^(Fo^2^)+(0.0190P)^2^+0.0000P] where P=(Fo^2^+2Fc^2^)/3'
_refine_ls_extinction_method            SHELXL
_refine_ls_extinction_expression
                                    Fc^*^=kFc[1+0.001xFc^2^\l^3^/sin(2\q)]^-1/4^
_refine_ls_extinction_coef              0.0110(6)
_refine_ls_number_reflns                787
_refine_ls_number_parameters            56
_refine_ls_number_restraints            0
_refine_ls_R_factor_all                 0.0202
_refine_ls_R_factor_gt                  0.0182
_refine_ls_wR_factor_ref                0.0392
_refine_ls_wR_factor_gt                 0.0386
_refine_ls_goodness_of_fit_ref          1.087
_refine_ls_restrained_S_all             1.087
_refine_ls_shift/su_max                 0.001
_refine_ls_shift/su_mean                0
_refine_diff_density_max                0.685
_refine_diff_density_min                -0.61
_refine_diff_density_rms                0.16
 
#----------------------------------------------------------------------------#
#                   ATOMIC TYPES, COORDINATES AND THERMAL PARAMETERS         #
#----------------------------------------------------------------------------#
 
loop_
    _atom_type_symbol
    _atom_type_description
    _atom_type_scat_dispersion_real
    _atom_type_scat_dispersion_imag
    _atom_type_scat_source
O O 0.0106 0.006 'International Tables Vol C Tables 4.2.6.8 and 6.1.1.4'
K K 0.2009 0.2494 'International Tables Vol C Tables 4.2.6.8 and 6.1.1.4'
Ga Ga 0.2307 1.6083 'International Tables Vol C Tables 4.2.6.8 and 6.1.1.4'
Se Se -0.0929 2.2259 'International Tables Vol C Tables 4.2.6.8 and 6.1.1.4'
 
loop_
    _atom_site_label
    _atom_site_type_symbol
    _atom_site_fract_x
    _atom_site_fract_y
    _atom_site_fract_z
    _atom_site_U_iso_or_equiv
    _atom_site_adp_type
    _atom_site_occupancy
    _atom_site_symmetry_multiplicity
    _atom_site_calc_flag
    _atom_site_refinement_flags
    _atom_site_disorder_assembly
    _atom_site_disorder_group
Se1 Se 0.477240(19) 0.25 0.88364(4) 0.00861(11) Uani 1 2 d S . .
Se2 Se 0.274367(19) 0.25 0.00504(4) 0.00891(11) Uani 1 2 d S . .
Ga1 Ga 0.37219(2) -0.25 0.80866(5) 0.00859(11) Uani 1 2 d S . .
K1 K 0.38936(5) 0.25 0.42558(12) 0.01882(18) Uani 1 2 d S . .
O1 O 0.58834(14) 0.25 0.9296(3) 0.0129(5) Uani 1 2 d S . .
O2 O 0.46667(9) 0.0029(3) 0.7391(2) 0.0124(4) Uani 1 1 d . . .
O3 O 0.16297(15) 0.25 0.0502(3) 0.0121(5) Uani 1 2 d S . .
O4 O 0.27974(10) 0.0058(3) -0.1433(2) 0.0147(4) Uani 1 1 d . . .
 
loop_
    _atom_site_aniso_label
    _atom_site_aniso_U_11
    _atom_site_aniso_U_22
    _atom_site_aniso_U_33
    _atom_site_aniso_U_23
    _atom_site_aniso_U_13
    _atom_site_aniso_U_12
Se1 0.00968(16) 0.00831(17) 0.00785(18) 0 -0.00025(11) 0
Se2 0.00891(17) 0.00982(18) 0.00800(19) 0 0.00061(11) 0
Ga1 0.00964(18) 0.00776(18) 0.0084(2) 0 -0.00144(13) 0
K1 0.0181(3) 0.0209(4) 0.0175(4) 0 -0.0013(3) 0
O1 0.0093(10) 0.0179(12) 0.0116(12) 0 -0.0026(9) 0
O2 0.0152(8) 0.0108(8) 0.0112(9) -0.0024(6) -0.0003(7) -0.0023(6)
O3 0.0089(10) 0.0159(11) 0.0115(12) 0 0.0009(9) 0
O4 0.0153(8) 0.0136(8) 0.0154(9) -0.0061(7) -0.0009(6) 0.0045(6)
 
 
#----------------------------------------------------------------------------#
#                   MOLECULAR GEOMETRY                                       #
#----------------------------------------------------------------------------#
 
_geom_special_details
;
 All esds (except the esd in the dihedral angle between two l.s. planes)
 are estimated using the full covariance matrix.  The cell esds are taken
 into account individually in the estimation of esds in distances, angles
 and torsion angles; correlations between esds in cell parameters are only
 used when they are defined by crystal symmetry.  An approximate (isotropic)
 treatment of cell esds is used for estimating esds involving l.s. planes.
;
loop_
    _geom_bond_atom_site_label_1
    _geom_bond_atom_site_label_2
    _geom_bond_distance
    _geom_bond_site_symmetry_2
    _geom_bond_publ_flag
Se1 O2 1.6929(16) . ?
Se1 O2 1.6929(16) 7_565 ?
Se1 O1 1.697(2) . ?
Se1 K1 3.5882(9) . ?
Se2 O4 1.6928(17) . ?
Se2 O4 1.6928(17) 7_565 ?
Se2 O3 1.700(2) . ?
Se2 K1 3.5154(9) . ?
Se2 K1 3.6655(5) 2_554 ?
Se2 K1 3.6655(5) 2_564 ?
Ga1 O3 1.956(2) 2 ?
Ga1 O4 1.9737(16) 7_556 ?
Ga1 O4 1.9737(16) 1_556 ?
Ga1 O1 1.997(2) 5_657 ?
Ga1 O2 2.0181(15) . ?
Ga1 O2 2.0181(15) 7 ?
Ga1 K1 3.8664(7) 1_545 ?
Ga1 K1 3.8664(7) . ?
Ga1 K1 3.9579(8) 5_656 ?
Ga1 K1 4.0084(8) 2 ?
K1 O2 2.8112(17) 3_656 ?
K1 O2 2.8112(17) 5_656 ?
K1 O2 2.8795(18) 7_565 ?
K1 O2 2.8795(18) . ?
K1 O4 2.9191(18) 2 ?
K1 O4 2.9191(18) 8_666 ?
K1 O3 2.9203(10) 2_565 ?
K1 O3 2.9203(10) 2 ?
K1 Se2 3.6655(5) 2 ?
K1 Se2 3.6655(5) 2_565 ?
O1 Ga1 1.997(2) 5_657 ?
O2 K1 2.8112(17) 5_656 ?
O3 Ga1 1.956(2) 2_554 ?
O3 K1 2.9203(10) 2_554 ?
O3 K1 2.9203(10) 2_564 ?
O4 Ga1 1.9737(16) 1_554 ?
O4 K1 2.9191(18) 2_554 ?
 
loop_
    _geom_angle_atom_site_label_1
    _geom_angle_atom_site_label_2
    _geom_angle_atom_site_label_3
    _geom_angle
    _geom_angle_site_symmetry_1
    _geom_angle_site_symmetry_3
    _geom_angle_publ_flag
O2 Se1 O2 102.01(11) . 7_565 ?
O2 Se1 O1 102.38(7) . . ?
O2 Se1 O1 102.38(7) 7_565 . ?
O2 Se1 K1 52.18(6) . . ?
O2 Se1 K1 52.18(6) 7_565 . ?
O1 Se1 K1 122.90(9) . . ?
O4 Se2 O4 100.36(13) . 7_565 ?
O4 Se2 O3 99.80(7) . . ?
O4 Se2 O3 99.80(7) 7_565 . ?
O4 Se2 K1 122.24(6) . . ?
O4 Se2 K1 122.24(6) 7_565 . ?
O3 Se2 K1 108.17(8) . . ?
O4 Se2 K1 51.17(6) . 2_554 ?
O4 Se2 K1 119.26(6) 7_565 2_554 ?
O3 Se2 K1 51.27(3) . 2_554 ?
K1 Se2 K1 117.735(19) . 2_554 ?
O4 Se2 K1 119.26(6) . 2_564 ?
O4 Se2 K1 51.17(6) 7_565 2_564 ?
O3 Se2 K1 51.27(3) . 2_564 ?
K1 Se2 K1 117.734(19) . 2_564 ?
K1 Se2 K1 93.167(18) 2_554 2_564 ?
O3 Ga1 O4 88.96(7) 2 7_556 ?
O3 Ga1 O4 88.96(7) 2 1_556 ?
O4 Ga1 O4 87.31(10) 7_556 1_556 ?
O3 Ga1 O1 178.40(9) 2 5_657 ?
O4 Ga1 O1 92.19(7) 7_556 5_657 ?
O4 Ga1 O1 92.19(7) 1_556 5_657 ?
O3 Ga1 O2 86.95(7) 2 . ?
O4 Ga1 O2 175.57(7) 7_556 . ?
O4 Ga1 O2 94.34(7) 1_556 . ?
O1 Ga1 O2 91.86(7) 5_657 . ?
O3 Ga1 O2 86.95(7) 2 7 ?
O4 Ga1 O2 94.34(7) 7_556 7 ?
O4 Ga1 O2 175.57(7) 1_556 7 ?
O1 Ga1 O2 91.86(7) 5_657 7 ?
O2 Ga1 O2 83.73(9) . 7 ?
O3 Ga1 K1 47.35(2) 2 1_545 ?
O4 Ga1 K1 72.50(5) 7_556 1_545 ?
O4 Ga1 K1 130.55(5) 1_556 1_545 ?
O1 Ga1 K1 132.07(3) 5_657 1_545 ?
O2 Ga1 K1 103.39(5) . 1_545 ?
O2 Ga1 K1 46.56(5) 7 1_545 ?
O3 Ga1 K1 47.35(2) 2 . ?
O4 Ga1 K1 130.55(5) 7_556 . ?
O4 Ga1 K1 72.50(5) 1_556 . ?
O1 Ga1 K1 132.07(3) 5_657 . ?
O2 Ga1 K1 46.56(5) . . ?
O2 Ga1 K1 103.39(5) 7 . ?
K1 Ga1 K1 87.046(19) 1_545 . ?
O3 Ga1 K1 80.07(7) 2 5_656 ?
O4 Ga1 K1 135.18(5) 7_556 5_656 ?
O4 Ga1 K1 135.18(5) 1_556 5_656 ?
O1 Ga1 K1 98.33(6) 5_657 5_656 ?
O2 Ga1 K1 42.19(4) . 5_656 ?
O2 Ga1 K1 42.19(4) 7 5_656 ?
K1 Ga1 K1 68.197(15) 1_545 5_656 ?
K1 Ga1 K1 68.197(15) . 5_656 ?
O3 Ga1 K1 86.65(7) 2 2 ?
O4 Ga1 K1 43.69(5) 7_556 2 ?
O4 Ga1 K1 43.69(5) 1_556 2 ?
O1 Ga1 K1 94.94(6) 5_657 2 ?
O2 Ga1 K1 137.60(4) . 2 ?
O2 Ga1 K1 137.60(4) 7 2 ?
K1 Ga1 K1 102.619(13) 1_545 2 ?
K1 Ga1 K1 102.619(13) . 2 ?
K1 Ga1 K1 166.722(12) 5_656 2 ?
O2 K1 O2 57.25(7) 3_656 5_656 ?
O2 K1 O2 79.13(5) 3_656 7_565 ?
O2 K1 O2 104.44(4) 5_656 7_565 ?
O2 K1 O2 104.44(4) 3_656 . ?
O2 K1 O2 79.13(5) 5_656 . ?
O2 K1 O2 54.38(6) 7_565 . ?
O2 K1 O4 144.64(6) 3_656 2 ?
O2 K1 O4 111.61(5) 5_656 2 ?
O2 K1 O4 134.31(6) 7_565 2 ?
O2 K1 O4 105.78(4) . 2 ?
O2 K1 O4 111.61(5) 3_656 8_666 ?
O2 K1 O4 144.64(6) 5_656 8_666 ?
O2 K1 O4 105.78(4) 7_565 8_666 ?
O2 K1 O4 134.31(6) . 8_666 ?
O4 K1 O4 55.64(7) 2 8_666 ?
O2 K1 O3 84.36(5) 3_656 2_565 ?
O2 K1 O3 140.84(6) 5_656 2_565 ?
O2 K1 O3 56.26(6) 7_565 2_565 ?
O2 K1 O3 106.13(6) . 2_565 ?
O4 K1 O3 104.25(6) 2 2_565 ?
O4 K1 O3 52.78(5) 8_666 2_565 ?
O2 K1 O3 140.84(6) 3_656 2 ?
O2 K1 O3 84.36(5) 5_656 2 ?
O2 K1 O3 106.13(6) 7_565 2 ?
O2 K1 O3 56.26(6) . 2 ?
O4 K1 O3 52.78(5) 2 2 ?
O4 K1 O3 104.25(6) 8_666 2 ?
O3 K1 O3 131.49(9) 2_565 2 ?
O2 K1 Se2 90.20(4) 3_656 . ?
O2 K1 Se2 90.20(4) 5_656 . ?
O2 K1 Se2 152.71(3) 7_565 . ?
O2 K1 Se2 152.71(3) . . ?
O4 K1 Se2 54.91(4) 2 . ?
O4 K1 Se2 54.91(4) 8_666 . ?
O3 K1 Se2 98.03(5) 2_565 . ?
O3 K1 Se2 98.03(5) 2 . ?
O2 K1 Se1 96.65(4) 3_656 . ?
O2 K1 Se1 96.65(4) 5_656 . ?
O2 K1 Se1 27.67(3) 7_565 . ?
O2 K1 Se1 27.67(3) . . ?
O4 K1 Se1 118.57(4) 2 . ?
O4 K1 Se1 118.57(4) 8_666 . ?
O3 K1 Se1 79.00(5) 2_565 . ?
O3 K1 Se1 79.00(5) 2 . ?
Se2 K1 Se1 172.19(3) . . ?
O2 K1 Se2 158.19(4) 3_656 2 ?
O2 K1 Se2 103.44(3) 5_656 2 ?
O2 K1 Se2 118.39(4) 7_565 2 ?
O2 K1 Se2 79.15(3) . 2 ?
O4 K1 Se2 26.86(3) 2 2 ?
O4 K1 Se2 77.64(4) 8_666 2 ?
O3 K1 Se2 115.70(5) 2_565 2 ?
O3 K1 Se2 27.01(4) 2 2 ?
Se2 K1 Se2 79.050(14) . 2 ?
Se1 K1 Se2 95.646(18) . 2 ?
O2 K1 Se2 103.44(3) 3_656 2_565 ?
O2 K1 Se2 158.19(4) 5_656 2_565 ?
O2 K1 Se2 79.15(3) 7_565 2_565 ?
O2 K1 Se2 118.39(4) . 2_565 ?
O4 K1 Se2 77.64(4) 2 2_565 ?
O4 K1 Se2 26.86(3) 8_666 2_565 ?
O3 K1 Se2 27.01(4) 2_565 2_565 ?
O3 K1 Se2 115.70(5) 2 2_565 ?
Se2 K1 Se2 79.050(14) . 2_565 ?
Se1 K1 Se2 95.646(18) . 2_565 ?
Se2 K1 Se2 93.167(18) 2 2_565 ?
Se1 O1 Ga1 118.60(13) . 5_657 ?
Se1 O2 Ga1 115.34(8) . . ?
Se1 O2 K1 124.49(7) . 5_656 ?
Ga1 O2 K1 108.98(6) . 5_656 ?
Se1 O2 K1 100.15(7) . . ?
Ga1 O2 K1 102.85(6) . . ?
K1 O2 K1 100.87(5) 5_656 . ?
Se2 O3 Ga1 116.78(13) . 2_554 ?
Se2 O3 K1 101.72(6) . 2_554 ?
Ga1 O3 K1 103.13(6) 2_554 2_554 ?
Se2 O3 K1 101.72(6) . 2_564 ?
Ga1 O3 K1 103.13(6) 2_554 2_564 ?
K1 O3 K1 131.49(9) 2_554 2_564 ?
Se2 O4 Ga1 132.59(9) . 1_554 ?
Se2 O4 K1 101.97(7) . 2_554 ?
Ga1 O4 K1 108.47(7) 1_554 2_554 ?
 
#===END


data_CsGa(SeO3)2
#----------------------------------------------------------------------------#
#                   CHEMICAL INFORMATION                                     #
#----------------------------------------------------------------------------#
 
_chemical_name_systematic
;
 ?
;
_chemical_formula_sum                   'Cs Ga O6 Se2'
_chemical_formula_weight                456.55
 
#----------------------------------------------------------------------------#
#                   UNIT CELL INFORMATION                                    #
#----------------------------------------------------------------------------#
 
loop_
    _symmetry_equiv_pos_as_xyz
'x, y, z'
'-x, y, -z'
'x+1/2, y+1/2, z'
'-x+1/2, y+1/2, -z'
'-x, -y, -z'
'x, -y, z'
'-x+1/2, -y+1/2, -z'
'x+1/2, -y+1/2, z'
 
_symmetry_cell_setting                  Monoclinic 
_symmetry_space_group_name_H-M          'C2/m'
_cell_length_a                          13.7906(7)
_cell_length_b                          5.4755(3)
_cell_length_c                          18.3055(9)
_cell_angle_alpha                       90
_cell_angle_beta                        107.612(2)
_cell_angle_gamma                       90
_cell_volume                            1317.47(12)
_cell_formula_units_Z                   8
_cell_measurement_temperature           173.0(2)
 
#----------------------------------------------------------------------------#
#                   CRYSTAL INFORMATION                                      #
#----------------------------------------------------------------------------#
 
_exptl_crystal_density_diffrn           4.604
_exptl_crystal_density_method           'not measured'
_exptl_crystal_F_000                    1616
_exptl_crystal_description              'Rod'
_exptl_crystal_colour                   'Colorless'
_exptl_crystal_size_max                 0.041
_exptl_crystal_size_mid                 0.026
_exptl_crystal_size_min                 0.023
_exptl_special_details
;
 ?
;
 
#----------------------------------------------------------------------------#
#                   ABSORPTION CORRECTION                                    #
#----------------------------------------------------------------------------#
 
_exptl_absorpt_coefficient_mu           20.643
_exptl_absorpt_correction_type          'EMPIRICAL'
_exptl_absorpt_process_details 
; 
 SADABS(Blessing, 1995) 
; 
_exptl_absorpt_correction_T_min		0.53
_exptl_absorpt_correction_T_max		0.62
 
#----------------------------------------------------------------------------#
#                   DATA COLLECTION                                          #
#----------------------------------------------------------------------------#
 
_diffrn_measurement_device_type         'Bruker SMART BREEZE'
_diffrn_measurement_method              CCD
_diffrn_ambient_temperature             173.0(2)
_diffrn_radiation_wavelength            0.71073
_diffrn_radiation_type                  MoK\a
_diffrn_radiation_monochromator         graphite
_diffrn_reflns_av_R_equivalents         0.0596
_diffrn_reflns_av_unetI/netI            0.0652
_diffrn_reflns_number                   5672
_diffrn_reflns_limit_h_min              -15
_diffrn_reflns_limit_h_max              18
_diffrn_reflns_limit_k_min              -7
_diffrn_reflns_limit_k_max              7
_diffrn_reflns_limit_l_min              -24
_diffrn_reflns_limit_l_max              23
_diffrn_reflns_theta_min                2.33
_diffrn_reflns_theta_max                28.3
_diffrn_reflns_theta_full               28.3
_diffrn_measured_fraction_theta_full
                                        0.996
_diffrn_measured_fraction_theta_max
                                        0.996
_reflns_number_total                    1807
_reflns_number_gt                       1363
_reflns_threshold_expression            >2s\(I)
 
#----------------------------------------------------------------------------#
#                   COMPUTER PROGRAMS USED                                   #
#----------------------------------------------------------------------------#
 
_computing_structure_refinement         'SHELXL-97 (Sheldrick, 1997)'
 
#----------------------------------------------------------------------------#
#                   STRUCTURE SOLUTION
#----------------------------------------------------------------------------#
 
_atom_sites_solution_primary            direct
_atom_sites_solution_secondary          difmap
 
#----------------------------------------------------------------------------#
#                   REFINEMENT INFORMATION                                   #
#----------------------------------------------------------------------------#
 
_refine_special_details
;
 Refinement of F^2^ against ALL reflections.  The weighted R-factor wR and
 goodness of fit S are based on F^2^, conventional R-factors R are based
 on F, with F set to zero for negative F^2^. The threshold expression of
 F^2^ > 2sigma(F^2^) is used only for calculating R-factors(gt) etc. and is
 not relevant to the choice of reflections for refinement.  R-factors based
 on F^2^ are statistically about twice as large as those based on F, and R-
 factors based on ALL data will be even larger.
;
_refine_ls_structure_factor_coef        Fsqd
_refine_ls_matrix_type                  full
_refine_ls_weighting_scheme             calc
_refine_ls_weighting_details
         'calc w=1/[\s^2^(Fo^2^)+(0.0523P)^2^+0.0000P] where P=(Fo^2^+2Fc^2^)/3'
_refine_ls_extinction_method            SHELXL
_refine_ls_extinction_expression
                                    Fc^*^=kFc[1+0.001xFc^2^\l^3^/sin(2\q)]^-1/4^
_refine_ls_extinction_coef              0.00094(11)
_refine_ls_number_reflns                1807
_refine_ls_number_parameters            112
_refine_ls_number_restraints            0
_refine_ls_R_factor_all                 0.0462
_refine_ls_R_factor_gt                  0.032
_refine_ls_wR_factor_ref                0.1065
_refine_ls_wR_factor_gt                 0.0765
_refine_ls_goodness_of_fit_ref          1.006
_refine_ls_restrained_S_all             1.006
_refine_ls_shift/su_max                 0
_refine_ls_shift/su_mean                0
_refine_diff_density_max                1.808
_refine_diff_density_min                -1.279
_refine_diff_density_rms                0.331
 
#----------------------------------------------------------------------------#
#                   ATOMIC TYPES, COORDINATES AND THERMAL PARAMETERS         #
#----------------------------------------------------------------------------#
 
loop_
    _atom_type_symbol
    _atom_type_description
    _atom_type_scat_dispersion_real
    _atom_type_scat_dispersion_imag
    _atom_type_scat_source
O O 0.0106 0.006 'International Tables Vol C Tables 4.2.6.8 and 6.1.1.4'
Ga Ga 0.2307 1.6083 'International Tables Vol C Tables 4.2.6.8 and 6.1.1.4'
Se Se -0.0929 2.2259 'International Tables Vol C Tables 4.2.6.8 and 6.1.1.4'
Cs Cs -0.368 2.1192 'International Tables Vol C Tables 4.2.6.8 and 6.1.1.4'
 
loop_
    _atom_site_label
    _atom_site_type_symbol
    _atom_site_fract_x
    _atom_site_fract_y
    _atom_site_fract_z
    _atom_site_U_iso_or_equiv
    _atom_site_adp_type
    _atom_site_occupancy
    _atom_site_symmetry_multiplicity
    _atom_site_calc_flag
    _atom_site_refinement_flags
    _atom_site_disorder_assembly
    _atom_site_disorder_group
Cs1 Cs -0.04933(6) 0 0.29248(4) 0.0168(2) Uani 1 2 d S . .
Cs2 Cs 0 0 0 0.0298(3) Uani 1 4 d S . .
Cs3 Cs 0.5 0 0.5 0.0546(5) Uani 1 4 d S . .
Se1 Se -0.23537(9) 0 0.05623(7) 0.0110(3) Uani 1 2 d S . .
Se2 Se 0.05610(9) 0.5 0.17986(7) 0.0141(3) Uani 1 2 d S . .
Se3 Se 0.24226(9) 0 0.26647(7) 0.0113(3) Uani 1 2 d S . .
Se4 Se 0.29485(8) 0.5 0.54584(6) 0.0095(3) Uani 1 2 d S . .
Ga1 Ga -0.15607(10) -0.5 0.12810(7) 0.0109(3) Uani 1 2 d S . .
Ga2 Ga 0.20050(10) 0.5 0.36497(7) 0.0101(3) Uani 1 2 d S . .
O1 O 0.1531(6) -0.5 -0.0179(5) 0.0188(19) Uani 1 2 d S . .
O2 O 0.2434(5) -0.2601(10) 0.1080(4) 0.0188(13) Uani 1 1 d . . .
O3 O -0.0322(4) -0.2770(10) 0.1513(3) 0.0167(13) Uani 1 1 d . . .
O4 O 0.0788(6) 0.5 0.2760(5) 0.022(2) Uani 1 2 d S . .
O5 O 0.2744(5) 0.2391(9) 0.3279(4) 0.0187(13) Uani 1 1 d . . .
O6 O -0.1528(6) -0.5 0.2360(5) 0.0151(17) Uani 1 2 d S . .
O7 O 0.1311(4) 0.2418(9) 0.4108(3) 0.0119(12) Uani 1 1 d . . .
O8 O 0.3216(6) 0.5 0.4605(5) 0.0145(17) Uani 1 2 d S . .
 
loop_
    _atom_site_aniso_label
    _atom_site_aniso_U_11
    _atom_site_aniso_U_22
    _atom_site_aniso_U_33
    _atom_site_aniso_U_23
    _atom_site_aniso_U_13
    _atom_site_aniso_U_12
Cs1 0.0159(4) 0.0157(4) 0.0174(4) 0 0.0030(3) 0
Cs2 0.0304(7) 0.0349(7) 0.0299(7) 0 0.0177(6) 0
Cs3 0.0643(11) 0.0364(8) 0.0917(15) 0 0.0666(11) 0
Se1 0.0143(6) 0.0098(5) 0.0091(6) 0 0.0040(4) 0
Se2 0.0137(6) 0.0165(6) 0.0117(6) 0 0.0033(5) 0
Se3 0.0124(6) 0.0117(5) 0.0105(6) 0 0.0043(4) 0
Se4 0.0107(5) 0.0090(5) 0.0087(6) 0 0.0029(4) 0
Ga1 0.0141(7) 0.0105(6) 0.0082(6) 0 0.0036(5) 0
Ga2 0.0139(6) 0.0087(5) 0.0076(6) 0 0.0030(5) 0
O1 0.011(4) 0.035(5) 0.009(4) 0 0.002(3) 0
O2 0.022(3) 0.018(3) 0.020(3) -0.010(3) 0.012(3) -0.008(2)
O3 0.015(3) 0.010(3) 0.024(4) 0.000(2) 0.004(3) -0.001(2)
O4 0.014(5) 0.033(5) 0.018(5) 0 0.003(4) 0
O5 0.028(4) 0.014(3) 0.018(3) -0.008(2) 0.013(3) -0.004(2)
O6 0.014(4) 0.023(4) 0.011(4) 0 0.007(3) 0
O7 0.013(3) 0.010(3) 0.014(3) 0.004(2) 0.006(2) 0.002(2)
O8 0.014(4) 0.019(4) 0.011(4) 0 0.005(3) 0
 
 
#----------------------------------------------------------------------------#
#                   MOLECULAR GEOMETRY                                       #
#----------------------------------------------------------------------------#
 
_geom_special_details
;
 All esds (except the esd in the dihedral angle between two l.s. planes)
 are estimated using the full covariance matrix.  The cell esds are taken
 into account individually in the estimation of esds in distances, angles
 and torsion angles; correlations between esds in cell parameters are only
 used when they are defined by crystal symmetry.  An approximate (isotropic)
 treatment of cell esds is used for estimating esds involving l.s. planes.
;
loop_
    _geom_bond_atom_site_label_1
    _geom_bond_atom_site_label_2
    _geom_bond_distance
    _geom_bond_site_symmetry_2
    _geom_bond_publ_flag
Cs1 O5 3.054(6) 3_445 ?
Cs1 O5 3.054(6) 8_455 ?
Cs1 O7 3.062(5) . ?
Cs1 O7 3.062(5) 6 ?
Cs1 O3 3.067(6) . ?
Cs1 O3 3.067(6) 6 ?
Cs1 O6 3.116(4) . ?
Cs1 O6 3.116(4) 1_565 ?
Cs1 O4 3.321(5) . ?
Cs1 O4 3.321(5) 1_545 ?
Cs1 Se4 3.8458(13) 7_556 ?
Cs1 Se3 3.8929(10) 3_445 ?
Cs2 O3 3.303(6) 2 ?
Cs2 O3 3.303(6) 6 ?
Cs2 O3 3.303(6) 5 ?
Cs2 O3 3.303(6) . ?
Cs2 O1 3.533(5) 5_545 ?
Cs2 O1 3.533(5) 1_565 ?
Cs2 O1 3.533(5) 5 ?
Cs2 O1 3.533(5) . ?
Cs2 O2 3.632(6) 2 ?
Cs2 O2 3.632(6) 6 ?
Cs2 O2 3.632(6) 5 ?
Cs2 O2 3.632(6) . ?
Cs3 O7 3.118(5) 4_546 ?
Cs3 O7 3.118(5) 7_556 ?
Cs3 O7 3.118(5) 8 ?
Cs3 O7 3.118(5) 3_545 ?
Cs3 O8 3.605(5) 1_545 ?
Cs3 O8 3.605(5) 5_666 ?
Cs3 O8 3.605(5) . ?
Cs3 O8 3.605(5) 5_656 ?
Cs3 Se4 3.8953(11) 7_556 ?
Cs3 Se4 3.8953(11) 3_545 ?
Cs3 Se4 4.2000(9) 1_545 ?
Cs3 Se4 4.2000(9) 5_666 ?
Se1 O2 1.696(6) 3_455 ?
Se1 O2 1.696(6) 8_445 ?
Se1 O1 1.715(8) 3_455 ?
Se2 O4 1.691(9) . ?
Se2 O3 1.692(6) 6 ?
Se2 O3 1.692(6) 1_565 ?
Se2 Ga1 2.7895(17) 1_565 ?
Se2 Cs1 3.9589(11) 1_565 ?
Se2 Cs2 4.1704(9) 1_565 ?
Se3 O5 1.695(6) . ?
Se3 O5 1.695(5) 6 ?
Se3 O6 1.702(8) 3 ?
Se3 Cs1 3.8929(10) 3 ?
Se3 Cs1 3.8929(10) 3_545 ?
Se4 O8 1.710(8) . ?
Se4 O7 1.713(5) 4_556 ?
Se4 O7 1.713(5) 7_556 ?
Se4 Cs1 3.8458(13) 7_556 ?
Se4 Cs3 3.8953(11) 3_455 ?
Se4 Cs3 4.2000(8) 1_565 ?
Ga1 O2 1.943(6) 3_445 ?
Ga1 O2 1.943(6) 8_445 ?
Ga1 O6 1.961(8) . ?
Ga1 O1 2.030(9) 5_545 ?
Ga1 O3 2.037(6) . ?
Ga1 O3 2.037(6) 6_545 ?
Ga1 Se2 2.7895(17) 1_545 ?
Ga1 Cs1 4.0045(11) 1_545 ?
Ga2 O4 1.954(9) . ?
Ga2 O5 1.990(6) 6_565 ?
Ga2 O5 1.990(6) . ?
Ga2 O8 2.020(9) . ?
Ga2 O7 2.026(5) 6_565 ?
Ga2 O7 2.026(5) . ?
Ga2 Cs1 4.0538(15) 3 ?
Ga2 Cs3 4.2298(13) 3_455 ?
Ga2 Cs1 4.2848(11) 1_565 ?
O1 Se1 1.715(8) 3_545 ?
O1 Ga1 2.030(9) 5_545 ?
O1 Cs2 3.533(5) 1_545 ?
O2 Se1 1.696(6) 3_545 ?
O2 Ga1 1.943(6) 3 ?
O3 Se2 1.692(6) 1_545 ?
O4 Cs1 3.321(5) 1_565 ?
O5 Cs1 3.054(6) 3 ?
O6 Se3 1.702(8) 3_445 ?
O6 Cs1 3.116(4) 1_545 ?
O7 Se4 1.713(5) 7_556 ?
O7 Cs3 3.118(5) 3_455 ?
O8 Cs3 3.605(5) 1_565 ?
 
loop_
    _geom_angle_atom_site_label_1
    _geom_angle_atom_site_label_2
    _geom_angle_atom_site_label_3
    _geom_angle
    _geom_angle_site_symmetry_1
    _geom_angle_site_symmetry_3
    _geom_angle_publ_flag
O5 Cs1 O5 55.8(2) 3_445 8_455 ?
O5 Cs1 O7 125.52(16) 3_445 . ?
O5 Cs1 O7 100.15(15) 8_455 . ?
O5 Cs1 O7 100.15(15) 3_445 6 ?
O5 Cs1 O7 125.52(16) 8_455 6 ?
O7 Cs1 O7 51.25(18) . 6 ?
O5 Cs1 O3 102.52(15) 3_445 . ?
O5 Cs1 O3 132.81(16) 8_455 . ?
O7 Cs1 O3 123.83(15) . . ?
O7 Cs1 O3 97.41(14) 6 . ?
O5 Cs1 O3 132.81(16) 3_445 6 ?
O5 Cs1 O3 102.52(15) 8_455 6 ?
O7 Cs1 O3 97.41(15) . 6 ?
O7 Cs1 O3 123.83(15) 6 6 ?
O3 Cs1 O3 59.3(2) . 6 ?
O5 Cs1 O6 49.12(18) 3_445 . ?
O5 Cs1 O6 99.65(17) 8_455 . ?
O7 Cs1 O6 143.84(16) . . ?
O7 Cs1 O6 92.71(16) 6 . ?
O3 Cs1 O6 55.24(18) . . ?
O3 Cs1 O6 107.40(18) 6 . ?
O5 Cs1 O6 99.65(17) 3_445 1_565 ?
O5 Cs1 O6 49.12(18) 8_455 1_565 ?
O7 Cs1 O6 92.71(16) . 1_565 ?
O7 Cs1 O6 143.84(16) 6 1_565 ?
O3 Cs1 O6 107.40(18) . 1_565 ?
O3 Cs1 O6 55.24(18) 6 1_565 ?
O6 Cs1 O6 123.0(3) . 1_565 ?
O5 Cs1 O4 152.19(16) 3_445 . ?
O5 Cs1 O4 96.50(16) 8_455 . ?
O7 Cs1 O4 50.73(18) . . ?
O7 Cs1 O4 94.59(17) 6 . ?
O3 Cs1 O4 98.76(18) . . ?
O3 Cs1 O4 48.47(18) 6 . ?
O6 Cs1 O4 153.7(2) . . ?
O6 Cs1 O4 56.51(18) 1_565 . ?
O5 Cs1 O4 96.50(16) 3_445 1_545 ?
O5 Cs1 O4 152.19(16) 8_455 1_545 ?
O7 Cs1 O4 94.59(17) . 1_545 ?
O7 Cs1 O4 50.73(18) 6 1_545 ?
O3 Cs1 O4 48.47(18) . 1_545 ?
O3 Cs1 O4 98.76(18) 6 1_545 ?
O6 Cs1 O4 56.51(18) . 1_545 ?
O6 Cs1 O4 153.7(2) 1_565 1_545 ?
O4 Cs1 O4 111.0(2) . 1_545 ?
O5 Cs1 Se4 115.86(12) 3_445 7_556 ?
O5 Cs1 Se4 115.86(12) 8_455 7_556 ?
O7 Cs1 Se4 25.65(9) . 7_556 ?
O7 Cs1 Se4 25.65(9) 6 7_556 ?
O3 Cs1 Se4 111.33(10) . 7_556 ?
O3 Cs1 Se4 111.33(10) 6 7_556 ?
O6 Cs1 Se4 118.36(13) . 7_556 ?
O6 Cs1 Se4 118.36(13) 1_565 7_556 ?
O4 Cs1 Se4 71.54(14) . 7_556 ?
O4 Cs1 Se4 71.54(14) 1_545 7_556 ?
O5 Cs1 Se3 24.66(11) 3_445 3_445 ?
O5 Cs1 Se3 75.48(11) 8_455 3_445 ?
O7 Cs1 Se3 143.38(10) . 3_445 ?
O7 Cs1 Se3 101.20(10) 6 3_445 ?
O3 Cs1 Se3 77.95(11) . 3_445 ?
O3 Cs1 Se3 119.14(11) 6 3_445 ?
O6 Cs1 Se3 25.11(14) . 3_445 ?
O6 Cs1 Se3 109.29(13) 1_565 3_445 ?
O4 Cs1 Se3 164.15(14) . 3_445 ?
O4 Cs1 Se3 78.61(12) 1_545 3_445 ?
Se4 Cs1 Se3 124.20(2) 7_556 3_445 ?
O3 Cs2 O3 180.00(19) 2 6 ?
O3 Cs2 O3 54.68(19) 2 5 ?
O3 Cs2 O3 125.32(19) 6 5 ?
O3 Cs2 O3 125.32(19) 2 . ?
O3 Cs2 O3 54.68(19) 6 . ?
O3 Cs2 O3 180.0(3) 5 . ?
O3 Cs2 O1 87.57(16) 2 5_545 ?
O3 Cs2 O1 92.43(16) 6 5_545 ?
O3 Cs2 O1 132.02(17) 5 5_545 ?
O3 Cs2 O1 47.98(17) . 5_545 ?
O3 Cs2 O1 92.43(16) 2 1_565 ?
O3 Cs2 O1 87.57(16) 6 1_565 ?
O3 Cs2 O1 47.98(17) 5 1_565 ?
O3 Cs2 O1 132.02(17) . 1_565 ?
O1 Cs2 O1 180 5_545 1_565 ?
O3 Cs2 O1 132.02(17) 2 5 ?
O3 Cs2 O1 47.98(17) 6 5 ?
O3 Cs2 O1 87.57(16) 5 5 ?
O3 Cs2 O1 92.43(16) . 5 ?
O1 Cs2 O1 101.6(2) 5_545 5 ?
O1 Cs2 O1 78.4(2) 1_565 5 ?
O3 Cs2 O1 47.98(17) 2 . ?
O3 Cs2 O1 132.02(17) 6 . ?
O3 Cs2 O1 92.43(16) 5 . ?
O3 Cs2 O1 87.57(16) . . ?
O1 Cs2 O1 78.4(2) 5_545 . ?
O1 Cs2 O1 101.6(2) 1_565 . ?
O1 Cs2 O1 180.0(3) 5 . ?
O3 Cs2 O2 72.55(13) 2 2 ?
O3 Cs2 O2 107.45(13) 6 2 ?
O3 Cs2 O2 93.46(13) 5 2 ?
O3 Cs2 O2 86.54(13) . 2 ?
O1 Cs2 O2 42.83(16) 5_545 2 ?
O1 Cs2 O2 137.17(16) 1_565 2 ?
O1 Cs2 O2 82.79(14) 5 2 ?
O1 Cs2 O2 97.21(14) . 2 ?
O3 Cs2 O2 107.45(13) 2 6 ?
O3 Cs2 O2 72.55(13) 6 6 ?
O3 Cs2 O2 86.54(13) 5 6 ?
O3 Cs2 O2 93.46(13) . 6 ?
O1 Cs2 O2 137.17(16) 5_545 6 ?
O1 Cs2 O2 42.83(16) 1_565 6 ?
O1 Cs2 O2 97.21(14) 5 6 ?
O1 Cs2 O2 82.79(14) . 6 ?
O2 Cs2 O2 180.0(3) 2 6 ?
O3 Cs2 O2 93.46(13) 2 5 ?
O3 Cs2 O2 86.54(13) 6 5 ?
O3 Cs2 O2 72.55(13) 5 5 ?
O3 Cs2 O2 107.45(13) . 5 ?
O1 Cs2 O2 82.79(14) 5_545 5 ?
O1 Cs2 O2 97.21(14) 1_565 5 ?
O1 Cs2 O2 42.83(16) 5 5 ?
O1 Cs2 O2 137.17(16) . 5 ?
O2 Cs2 O2 46.18(17) 2 5 ?
O2 Cs2 O2 133.82(17) 6 5 ?
O3 Cs2 O2 86.54(13) 2 . ?
O3 Cs2 O2 93.46(13) 6 . ?
O3 Cs2 O2 107.45(13) 5 . ?
O3 Cs2 O2 72.55(13) . . ?
O1 Cs2 O2 97.21(14) 5_545 . ?
O1 Cs2 O2 82.79(14) 1_565 . ?
O1 Cs2 O2 137.17(16) 5 . ?
O1 Cs2 O2 42.83(16) . . ?
O2 Cs2 O2 133.82(17) 2 . ?
O2 Cs2 O2 46.18(17) 6 . ?
O2 Cs2 O2 180.00(16) 5 . ?
O7 Cs3 O7 53.92(18) 4_546 7_556 ?
O7 Cs3 O7 180 4_546 8 ?
O7 Cs3 O7 126.08(18) 7_556 8 ?
O7 Cs3 O7 126.08(18) 4_546 3_545 ?
O7 Cs3 O7 180.00(15) 7_556 3_545 ?
O7 Cs3 O7 53.92(18) 8 3_545 ?
O7 Cs3 O8 44.92(16) 4_546 1_545 ?
O7 Cs3 O8 88.88(15) 7_556 1_545 ?
O7 Cs3 O8 135.08(16) 8 1_545 ?
O7 Cs3 O8 91.12(15) 3_545 1_545 ?
O7 Cs3 O8 135.08(16) 4_546 5_666 ?
O7 Cs3 O8 91.12(15) 7_556 5_666 ?
O7 Cs3 O8 44.92(16) 8 5_666 ?
O7 Cs3 O8 88.88(15) 3_545 5_666 ?
O8 Cs3 O8 180 1_545 5_666 ?
O7 Cs3 O8 88.88(15) 4_546 . ?
O7 Cs3 O8 44.92(16) 7_556 . ?
O7 Cs3 O8 91.12(15) 8 . ?
O7 Cs3 O8 135.08(16) 3_545 . ?
O8 Cs3 O8 98.8(2) 1_545 . ?
O8 Cs3 O8 81.2(2) 5_666 . ?
O7 Cs3 O8 91.12(15) 4_546 5_656 ?
O7 Cs3 O8 135.08(16) 7_556 5_656 ?
O7 Cs3 O8 88.88(15) 8 5_656 ?
O7 Cs3 O8 44.92(16) 3_545 5_656 ?
O8 Cs3 O8 81.2(2) 1_545 5_656 ?
O8 Cs3 O8 98.8(2) 5_666 5_656 ?
O8 Cs3 O8 180 . 5_656 ?
O7 Cs3 Se4 51.67(10) 4_546 7_556 ?
O7 Cs3 Se4 51.67(10) 7_556 7_556 ?
O7 Cs3 Se4 128.33(10) 8 7_556 ?
O7 Cs3 Se4 128.33(10) 3_545 7_556 ?
O8 Cs3 Se4 49.62(10) 1_545 7_556 ?
O8 Cs3 Se4 130.38(10) 5_666 7_556 ?
O8 Cs3 Se4 49.62(10) . 7_556 ?
O8 Cs3 Se4 130.38(10) 5_656 7_556 ?
O7 Cs3 Se4 128.33(10) 4_546 3_545 ?
O7 Cs3 Se4 128.33(10) 7_556 3_545 ?
O7 Cs3 Se4 51.67(10) 8 3_545 ?
O7 Cs3 Se4 51.67(10) 3_545 3_545 ?
O8 Cs3 Se4 130.38(10) 1_545 3_545 ?
O8 Cs3 Se4 49.62(10) 5_666 3_545 ?
O8 Cs3 Se4 130.38(10) . 3_545 ?
O8 Cs3 Se4 49.62(10) 5_656 3_545 ?
Se4 Cs3 Se4 180 7_556 3_545 ?
O7 Cs3 Se4 21.16(10) 4_546 1_545 ?
O7 Cs3 Se4 70.03(9) 7_556 1_545 ?
O7 Cs3 Se4 158.84(10) 8 1_545 ?
O7 Cs3 Se4 109.97(9) 3_545 1_545 ?
O8 Cs3 Se4 23.77(13) 1_545 1_545 ?
O8 Cs3 Se4 156.23(13) 5_666 1_545 ?
O8 Cs3 Se4 94.29(10) . 1_545 ?
O8 Cs3 Se4 85.71(10) 5_656 1_545 ?
Se4 Cs3 Se4 47.210(17) 7_556 1_545 ?
Se4 Cs3 Se4 132.790(17) 3_545 1_545 ?
O7 Cs3 Se4 158.84(10) 4_546 5_666 ?
O7 Cs3 Se4 109.97(9) 7_556 5_666 ?
O7 Cs3 Se4 21.16(10) 8 5_666 ?
O7 Cs3 Se4 70.03(9) 3_545 5_666 ?
O8 Cs3 Se4 156.23(13) 1_545 5_666 ?
O8 Cs3 Se4 23.77(13) 5_666 5_666 ?
O8 Cs3 Se4 85.71(10) . 5_666 ?
O8 Cs3 Se4 94.29(10) 5_656 5_666 ?
Se4 Cs3 Se4 132.790(17) 7_556 5_666 ?
Se4 Cs3 Se4 47.210(17) 3_545 5_666 ?
Se4 Cs3 Se4 180.00(2) 1_545 5_666 ?
O2 Se1 O2 101.5(4) 3_455 8_445 ?
O2 Se1 O1 100.2(3) 3_455 3_455 ?
O2 Se1 O1 100.2(3) 8_445 3_455 ?
O2 Se1 Cs2 118.1(2) 3_455 . ?
O2 Se1 Cs2 118.1(2) 8_445 . ?
O1 Se1 Cs2 115.7(3) 3_455 . ?
O2 Se1 Cs1 65.8(2) 3_455 . ?
O2 Se1 Cs1 65.8(2) 8_445 . ?
O1 Se1 Cs1 155.9(3) 3_455 . ?
Cs2 Se1 Cs1 88.46(3) . . ?
O4 Se2 O3 102.2(3) . 6 ?
O4 Se2 O3 102.2(3) . 1_565 ?
O3 Se2 O3 92.4(4) 6 1_565 ?
O4 Se2 Ga1 101.4(3) . 1_565 ?
O3 Se2 Ga1 46.52(19) 6 1_565 ?
O3 Se2 Ga1 46.52(19) 1_565 1_565 ?
O4 Se2 Cs1 55.93(16) . 1_565 ?
O3 Se2 Cs1 108.5(2) 6 1_565 ?
O3 Se2 Cs1 47.1(2) 1_565 1_565 ?
Ga1 Se2 Cs1 70.37(3) 1_565 1_565 ?
O4 Se2 Cs1 55.93(16) . . ?
O3 Se2 Cs1 47.1(2) 6 . ?
O3 Se2 Cs1 108.5(2) 1_565 . ?
Ga1 Se2 Cs1 70.37(3) 1_565 . ?
Cs1 Se2 Cs1 87.50(3) 1_565 . ?
O4 Se2 Cs2 138.85(2) . . ?
O3 Se2 Cs2 48.5(2) 6 . ?
O3 Se2 Cs2 106.6(2) 1_565 . ?
Ga1 Se2 Cs2 78.87(3) 1_565 . ?
Cs1 Se2 Cs2 148.81(3) 1_565 . ?
Cs1 Se2 Cs2 86.990(13) . . ?
O4 Se2 Cs2 138.85(2) . 1_565 ?
O3 Se2 Cs2 106.6(2) 6 1_565 ?
O3 Se2 Cs2 48.5(2) 1_565 1_565 ?
Ga1 Se2 Cs2 78.87(3) 1_565 1_565 ?
Cs1 Se2 Cs2 86.990(13) 1_565 1_565 ?
Cs1 Se2 Cs2 148.81(3) . 1_565 ?
Cs2 Se2 Cs2 82.06(2) . 1_565 ?
O5 Se3 O5 101.1(4) . 6 ?
O5 Se3 O6 98.1(3) . 3 ?
O5 Se3 O6 98.1(3) 6 3 ?
O5 Se3 Cs1 48.7(2) . 3 ?
O5 Se3 Cs1 115.3(2) 6 3 ?
O6 Se3 Cs1 50.97(12) 3 3 ?
O5 Se3 Cs1 115.3(2) . 3_545 ?
O5 Se3 Cs1 48.7(2) 6 3_545 ?
O6 Se3 Cs1 50.97(12) 3 3_545 ?
Cs1 Se3 Cs1 89.38(3) 3 3_545 ?
O5 Se3 Cs1 89.5(2) . . ?
O5 Se3 Cs1 89.5(2) 6 . ?
O6 Se3 Cs1 168.0(3) 3 . ?
Cs1 Se3 Cs1 133.201(17) 3 . ?
Cs1 Se3 Cs1 133.201(17) 3_545 . ?
O8 Se4 O7 99.2(3) . 4_556 ?
O8 Se4 O7 99.2(3) . 7_556 ?
O7 Se4 O7 101.2(4) 4_556 7_556 ?
O8 Se4 Cs1 107.7(3) . 7_556 ?
O7 Se4 Cs1 50.67(18) 4_556 7_556 ?
O7 Se4 Cs1 50.67(18) 7_556 7_556 ?
O8 Se4 Cs3 107.6(3) . 3_455 ?
O7 Se4 Cs3 122.46(18) 4_556 3_455 ?
O7 Se4 Cs3 122.46(18) 7_556 3_455 ?
Cs1 Se4 Cs3 144.67(3) 7_556 3_455 ?
O8 Se4 Cs3 58.21(18) . 1_565 ?
O7 Se4 Cs3 41.05(19) 4_556 1_565 ?
O7 Se4 Cs3 104.68(18) 7_556 1_565 ?
Cs1 Se4 Cs3 68.947(18) 7_556 1_565 ?
Cs3 Se4 Cs3 132.790(17) 3_455 1_565 ?
O8 Se4 Cs3 58.21(18) . . ?
O7 Se4 Cs3 104.68(18) 4_556 . ?
O7 Se4 Cs3 41.05(19) 7_556 . ?
Cs1 Se4 Cs3 68.947(18) 7_556 . ?
Cs3 Se4 Cs3 132.790(17) 3_455 . ?
Cs3 Se4 Cs3 81.36(2) 1_565 . ?
O2 Ga1 O2 94.3(4) 3_445 8_445 ?
O2 Ga1 O6 89.3(2) 3_445 . ?
O2 Ga1 O6 89.3(2) 8_445 . ?
O2 Ga1 O1 92.3(2) 3_445 5_545 ?
O2 Ga1 O1 92.3(2) 8_445 5_545 ?
O6 Ga1 O1 177.6(3) . 5_545 ?
O2 Ga1 O3 169.7(2) 3_445 . ?
O2 Ga1 O3 96.0(2) 8_445 . ?
O6 Ga1 O3 91.6(3) . . ?
O1 Ga1 O3 86.5(3) 5_545 . ?
O2 Ga1 O3 96.0(2) 3_445 6_545 ?
O2 Ga1 O3 169.7(2) 8_445 6_545 ?
O6 Ga1 O3 91.6(3) . 6_545 ?
O1 Ga1 O3 86.5(3) 5_545 6_545 ?
O3 Ga1 O3 73.7(3) . 6_545 ?
O2 Ga1 Se2 132.77(18) 3_445 1_545 ?
O2 Ga1 Se2 132.77(18) 8_445 1_545 ?
O6 Ga1 Se2 87.5(2) . 1_545 ?
O1 Ga1 Se2 90.2(2) 5_545 1_545 ?
O3 Ga1 Se2 37.07(16) . 1_545 ?
O3 Ga1 Se2 37.07(16) 6_545 1_545 ?
O2 Ga1 Cs1 136.23(19) 3_445 . ?
O2 Ga1 Cs1 73.74(19) 8_445 . ?
O6 Ga1 Cs1 49.63(10) . . ?
O1 Ga1 Cs1 129.30(11) 5_545 . ?
O3 Ga1 Cs1 48.66(17) . . ?
O3 Ga1 Cs1 99.15(16) 6_545 . ?
Se2 Ga1 Cs1 68.62(3) 1_545 . ?
O2 Ga1 Cs1 73.74(19) 3_445 1_545 ?
O2 Ga1 Cs1 136.23(19) 8_445 1_545 ?
O6 Ga1 Cs1 49.63(10) . 1_545 ?
O1 Ga1 Cs1 129.30(11) 5_545 1_545 ?
O3 Ga1 Cs1 99.15(16) . 1_545 ?
O3 Ga1 Cs1 48.66(17) 6_545 1_545 ?
Se2 Ga1 Cs1 68.62(3) 1_545 1_545 ?
Cs1 Ga1 Cs1 86.26(3) . 1_545 ?
O4 Ga2 O5 96.6(3) . 6_565 ?
O4 Ga2 O5 96.6(3) . . ?
O5 Ga2 O5 91.8(3) 6_565 . ?
O4 Ga2 O8 177.0(4) . . ?
O5 Ga2 O8 85.5(2) 6_565 . ?
O5 Ga2 O8 85.5(2) . . ?
O4 Ga2 O7 87.2(2) . 6_565 ?
O5 Ga2 O7 89.7(2) 6_565 6_565 ?
O5 Ga2 O7 175.7(2) . 6_565 ?
O8 Ga2 O7 90.7(2) . 6_565 ?
O4 Ga2 O7 87.2(2) . . ?
O5 Ga2 O7 175.7(2) 6_565 . ?
O5 Ga2 O7 89.7(2) . . ?
O8 Ga2 O7 90.7(2) . . ?
O7 Ga2 O7 88.5(3) 6_565 . ?
O4 Ga2 Cs1 109.2(3) . 3 ?
O5 Ga2 Cs1 46.68(16) 6_565 3 ?
O5 Ga2 Cs1 46.68(17) . 3 ?
O8 Ga2 Cs1 73.8(2) . 3 ?
O7 Ga2 Cs1 133.71(15) 6_565 3 ?
O7 Ga2 Cs1 133.71(15) . 3 ?
O4 Ga2 Cs3 86.5(3) . 3_455 ?
O5 Ga2 Cs3 133.79(17) 6_565 3_455 ?
O5 Ga2 Cs3 133.79(17) . 3_455 ?
O8 Ga2 Cs3 90.5(2) . 3_455 ?
O7 Ga2 Cs3 44.26(15) 6_565 3_455 ?
O7 Ga2 Cs3 44.26(15) . 3_455 ?
Cs1 Ga2 Cs3 164.33(4) 3 3_455 ?
O4 Ga2 Cs1 48.26(14) . . ?
O5 Ga2 Cs1 143.14(19) 6_565 . ?
O5 Ga2 Cs1 83.25(17) . . ?
O8 Ga2 Cs1 130.14(13) . . ?
O7 Ga2 Cs1 97.92(15) 6_565 . ?
O7 Ga2 Cs1 41.06(16) . . ?
Cs1 Ga2 Cs1 125.65(3) 3 . ?
Cs3 Ga2 Cs1 64.81(2) 3_455 . ?
O4 Ga2 Cs1 48.26(14) . 1_565 ?
O5 Ga2 Cs1 83.25(17) 6_565 1_565 ?
O5 Ga2 Cs1 143.14(19) . 1_565 ?
O8 Ga2 Cs1 130.14(13) . 1_565 ?
O7 Ga2 Cs1 41.06(15) 6_565 1_565 ?
O7 Ga2 Cs1 97.92(15) . 1_565 ?
Cs1 Ga2 Cs1 125.65(3) 3 1_565 ?
Cs3 Ga2 Cs1 64.81(2) 3_455 1_565 ?
Cs1 Ga2 Cs1 79.43(3) . 1_565 ?
Se1 O1 Ga1 120.2(4) 3_545 5_545 ?
Se1 O1 Cs2 110.2(2) 3_545 1_545 ?
Ga1 O1 Cs2 106.5(2) 5_545 1_545 ?
Se1 O1 Cs2 110.2(2) 3_545 . ?
Ga1 O1 Cs2 106.5(2) 5_545 . ?
Cs2 O1 Cs2 101.6(2) 1_545 . ?
Se1 O2 Ga1 116.1(3) 3_545 3 ?
Se1 O2 Cs2 106.7(3) 3_545 . ?
Ga1 O2 Cs2 107.7(2) 3 . ?
Se2 O3 Ga1 96.4(3) 1_545 . ?
Se2 O3 Cs1 109.1(3) 1_545 . ?
Ga1 O3 Cs1 101.4(2) . . ?
Se2 O3 Cs2 108.9(3) 1_545 . ?
Ga1 O3 Cs2 114.7(2) . . ?
Cs1 O3 Cs2 122.92(17) . . ?
Se2 O4 Ga2 135.2(5) . . ?
Se2 O4 Cs1 99.1(2) . . ?
Ga2 O4 Cs1 105.7(2) . . ?
Se2 O4 Cs1 99.1(2) . 1_565 ?
Ga2 O4 Cs1 105.7(2) . 1_565 ?
Cs1 O4 Cs1 111.0(2) . 1_565 ?
Se3 O5 Ga2 136.3(4) . . ?
Se3 O5 Cs1 106.6(3) . 3 ?
Ga2 O5 Cs1 105.0(2) . 3 ?
Se3 O6 Ga1 124.6(5) 3_445 . ?
Se3 O6 Cs1 103.92(19) 3_445 . ?
Ga1 O6 Cs1 101.71(18) . . ?
Se3 O6 Cs1 103.92(19) 3_445 1_545 ?
Ga1 O6 Cs1 101.71(18) . 1_545 ?
Cs1 O6 Cs1 123.0(3) . 1_545 ?
Se4 O7 Ga2 116.2(3) 7_556 . ?
Se4 O7 Cs1 103.7(2) 7_556 . ?
Ga2 O7 Cs1 113.2(2) . . ?
Se4 O7 Cs3 117.8(2) 7_556 3_455 ?
Ga2 O7 Cs3 108.78(19) . 3_455 ?
Cs1 O7 Cs3 95.20(15) . 3_455 ?
Se4 O8 Ga2 116.2(4) . . ?
Se4 O8 Cs3 98.0(2) . 1_565 ?
Ga2 O8 Cs3 120.59(19) . 1_565 ?
Se4 O8 Cs3 98.0(2) . . ?
Ga2 O8 Cs3 120.59(19) . . ?
Cs3 O8 Cs3 98.8(2) 1_565 . ?
 
#===END
